# Supplementary material for: π-Conjugated diimidazolium salts: rigid structure to obtain organized materials
Source: Royal Society of Chemistry journal article supplement (doi:10.1039/c5cp03808a), 2015-01-01
Supplement: c5cp03808a1.pdf [file c5cp03808a1.pdf]

## Supporting Information for

# $\pi$ -conjugated diimidazolium salts: rigid structures to obtain organized materials

*Paola Vitale,<sup>a</sup> Francesca D'Anna,<sup>a\*</sup> Francesco Ferrante,<sup>b</sup> Carla Rizzo,<sup>a</sup> Renato Noto<sup>a</sup>*

<sup>a</sup>Dipartimento STEBICEF, Università degli Studi di Palermo, Viale delle Scienze, Parco d'Orleans II, 90128 Palermo (Italy).

<sup>b</sup>Dipartimento di Fisica e Chimica, Università degli Studi di Palermo, Viale delle Scienze, Parco d'Orleans II, 90128 Palermo (Italy).

## Table of Contents:

|                                                                                                                                                                                                                                                                                                                                                                                                                                                                                                                                                                                                                                                                                                                                                                                                                                                                                                                                                                                                                      |            |
|----------------------------------------------------------------------------------------------------------------------------------------------------------------------------------------------------------------------------------------------------------------------------------------------------------------------------------------------------------------------------------------------------------------------------------------------------------------------------------------------------------------------------------------------------------------------------------------------------------------------------------------------------------------------------------------------------------------------------------------------------------------------------------------------------------------------------------------------------------------------------------------------------------------------------------------------------------------------------------------------------------------------|------------|
| <b>Fig. S1</b> <sup>1</sup> H NMR and <sup>13</sup> C NMR spectra corresponding to: (a), (b) <b>1</b> ; (c), (d) <b>2</b> ; (e), (f) [ <i>p</i> -C <sub>8</sub> Br <sub>2</sub> ]; (g), (h) [ <i>p</i> -C <sub>12</sub> Br <sub>2</sub> ]; (i), (j) [ <i>m</i> -C <sub>12</sub> Br <sub>2</sub> ]; (k), (l) [ <i>p</i> -C <sub>8</sub> (NTf <sub>2</sub> ) <sub>2</sub> ]; (m), (n) [ <i>p</i> -C <sub>12</sub> (NTf <sub>2</sub> ) <sub>2</sub> ] and (o), (p) [ <i>m</i> -C <sub>12</sub> (NTf <sub>2</sub> ) <sub>2</sub> ].                                                                                                                                                                                                                                                                                                                                                                                                                                                                                      | <b>S2</b>  |
| <b>Fig. S2</b> DSC traces corresponding to: (a) <b>1</b> ; (b) [ <i>p</i> -C <sub>8</sub> Br <sub>2</sub> ]; (c) [ <i>p</i> -C <sub>8</sub> (NTf <sub>2</sub> ) <sub>2</sub> ]; (d) [ <i>p</i> -C <sub>12</sub> Br <sub>2</sub> ]; (e) [ <i>p</i> -C <sub>12</sub> (NTf <sub>2</sub> ) <sub>2</sub> ]; (f) <b>2</b> ; (g) [ <i>m</i> -C <sub>12</sub> Br <sub>2</sub> ]; (h) [ <i>m</i> -C <sub>12</sub> (NTf <sub>2</sub> ) <sub>2</sub> ].                                                                                                                                                                                                                                                                                                                                                                                                                                                                                                                                                                         | <b>S10</b> |
| <b>Fig. S3</b> UV-vis and fluorescence spectra recorded in different solvents at 298 K for: (a) and (b) [ <i>p</i> -C <sub>8</sub> Br <sub>2</sub> ]; (c) and (d) [ <i>p</i> -C <sub>12</sub> Br <sub>2</sub> ]; (e) and (f) [ <i>p</i> -C <sub>8</sub> (NTf <sub>2</sub> ) <sub>2</sub> ]; (g) [ <i>m</i> -C <sub>12</sub> (NTf <sub>2</sub> ) <sub>2</sub> ].                                                                                                                                                                                                                                                                                                                                                                                                                                                                                                                                                                                                                                                      | <b>S11</b> |
| <b>Fig. S.</b> Plots of UV-vis and fluorescence maxima ( $\lambda_{MAX}$ ) recorded in different solvents at 298 K for: (a) and (b) [ <i>p</i> -C <sub>8</sub> Br <sub>2</sub> ]; (c) and (d) [ <i>p</i> -C <sub>12</sub> Br <sub>2</sub> ]; (e) and (f) [ <i>p</i> -C <sub>8</sub> (NTf <sub>2</sub> ) <sub>2</sub> ]; (g) and (h) [ <i>p</i> -C <sub>12</sub> (NTf <sub>2</sub> ) <sub>2</sub> ]; (i) <i>m</i> -C <sub>12</sub> (NTf <sub>2</sub> ) <sub>2</sub> .                                                                                                                                                                                                                                                                                                                                                                                                                                                                                                                                                 | <b>S12</b> |
| <b>Fig.S5</b> Plots of apparent absorption coefficient as a function of salt concentration corresponding to: (a) [ <i>p</i> -C <sub>8</sub> Br <sub>2</sub> ] in ACN; (b) [ <i>p</i> -C <sub>8</sub> Br <sub>2</sub> ] in THF; (c) [ <i>p</i> -C <sub>12</sub> Br <sub>2</sub> ] in 1-PrOH; (d) [ <i>p</i> -C <sub>12</sub> Br <sub>2</sub> ] in 2-PrOH; (e) [ <i>p</i> -C <sub>12</sub> Br <sub>2</sub> ] in CHCl <sub>3</sub> ; (f) [ <i>p</i> -C <sub>8</sub> (NTf <sub>2</sub> ) <sub>2</sub> ] in 2-PrOH; (g) [ <i>p</i> -C <sub>8</sub> (NTf <sub>2</sub> ) <sub>2</sub> ] in CHCl <sub>3</sub> ; (h) [ <i>p</i> -C <sub>8</sub> (NTf <sub>2</sub> ) <sub>2</sub> ] in 1,4-Diox; (i) [ <i>p</i> -C <sub>12</sub> (NTf <sub>2</sub> ) <sub>2</sub> ] in ACN; (j) [ <i>p</i> -C <sub>12</sub> (NTf <sub>2</sub> ) <sub>2</sub> ] in THF; (k) [ <i>m</i> -C <sub>12</sub> (NTf <sub>2</sub> ) <sub>2</sub> ] in 1-PrOH; (l) [ <i>m</i> -C <sub>12</sub> (NTf <sub>2</sub> ) <sub>2</sub> ] in CHCl <sub>3</sub> . | <b>S14</b> |
| <b>Fig. S6</b> Plots of fluorescence intensity as a function of salt concentration corresponding to: (a) [ <i>p</i> -C <sub>8</sub> Br <sub>2</sub> ] in ACN; (b) [ <i>p</i> -C <sub>8</sub> Br <sub>2</sub> ] in THF; (c) [ <i>p</i> -C <sub>12</sub> Br <sub>2</sub> ] in 1-PrOH; (d) [ <i>p</i> -C <sub>12</sub> Br <sub>2</sub> ] in 2-PrOH; (e) [ <i>p</i> -C <sub>12</sub> Br <sub>2</sub> ] in CHCl <sub>3</sub> ; (f) [ <i>p</i> -C <sub>8</sub> (NTf <sub>2</sub> ) <sub>2</sub> ] in 2-PrOH; (g) [ <i>p</i> -C <sub>8</sub> (NTf <sub>2</sub> ) <sub>2</sub> ] in CHCl <sub>3</sub> ; (h) [ <i>p</i> -C <sub>8</sub> (NTf <sub>2</sub> ) <sub>2</sub> ] in 1,4-Diox; (i) [ <i>p</i> -C <sub>12</sub> (NTf <sub>2</sub> ) <sub>2</sub> ] in ACN; (j) [ <i>p</i> -C <sub>12</sub> (NTf <sub>2</sub> ) <sub>2</sub> ] in THF.                                                                                                                                                                                 | <b>S16</b> |
| <b>Fig. S7</b> Stern-Volmer plots corresponding to: (a) [ <i>p</i> -C <sub>8</sub> Br <sub>2</sub> ] in ACN; (b) [ <i>p</i> -C <sub>8</sub> Br <sub>2</sub> ] in THF; (c) [ <i>p</i> -C <sub>12</sub> Br <sub>2</sub> ] in 1-PrOH; (d) [ <i>p</i> -C <sub>12</sub> Br <sub>2</sub> ] in 2-PrOH; (e) [ <i>p</i> -C <sub>12</sub> Br <sub>2</sub> ] in CHCl <sub>3</sub> ; (f) [ <i>p</i> -C <sub>8</sub> (NTf <sub>2</sub> ) <sub>2</sub> ] in 2-PrOH; (g) [ <i>p</i> -C <sub>8</sub> (NTf <sub>2</sub> ) <sub>2</sub> ] in CHCl <sub>3</sub> ; (h) [ <i>p</i> -C <sub>8</sub> (NTf <sub>2</sub> ) <sub>2</sub> ] in 1,4-Diox; (i) [ <i>p</i> -C <sub>12</sub> (NTf <sub>2</sub> ) <sub>2</sub> ] in ACN; (j) [ <i>p</i> -C <sub>12</sub> (NTf <sub>2</sub> ) <sub>2</sub> ] in THF.                                                                                                                                                                                                                                  | <b>S18</b> |
| <b>Fig. S8</b> Plots of RLS intensity as a function of salt concentration corresponding to: (a) [ <i>p</i> -C <sub>8</sub> Br <sub>2</sub> ] in ACN; (b) [ <i>p</i> -C <sub>8</sub> Br <sub>2</sub> ] in THF; (c) [ <i>p</i> -C <sub>12</sub> Br <sub>2</sub> ] in 1-PrOH; (d) [ <i>p</i> -C <sub>12</sub> Br <sub>2</sub> ] in 2-PrOH; (e) [ <i>p</i> -C <sub>12</sub> Br <sub>2</sub> ] in CHCl <sub>3</sub> ; (f) [ <i>p</i> -C <sub>8</sub> (NTf <sub>2</sub> ) <sub>2</sub> ] in 2-PrOH; (g) [ <i>p</i> -C <sub>8</sub> (NTf <sub>2</sub> ) <sub>2</sub> ] in CHCl <sub>3</sub> ; (h) [ <i>p</i> -C <sub>8</sub> (NTf <sub>2</sub> ) <sub>2</sub> ] in 1,4-Diox; (i) [ <i>p</i> -C <sub>12</sub> (NTf <sub>2</sub> ) <sub>2</sub> ] in ACN; (j) [ <i>p</i> -C <sub>12</sub> (NTf <sub>2</sub> ) <sub>2</sub> ] in THF.                                                                                                                                                                                          | <b>S19</b> |
| <b>Fig. S9</b> SEM images collected from casting of 1·10 <sup>-4</sup> M solution. (a) [ <i>p</i> -C <sub>8</sub> Br <sub>2</sub> ]/ACN; (b), (c) [ <i>p</i> -C <sub>8</sub> Br <sub>2</sub> ]/THF; (d) [ <i>p</i> -C <sub>12</sub> Br <sub>2</sub> ]/1-PrOH; (e), (f) [ <i>p</i> -C <sub>12</sub> Br <sub>2</sub> ]/CHCl <sub>3</sub> ; (g) [ <i>p</i> -C <sub>8</sub> (NTf <sub>2</sub> ) <sub>2</sub> ]/2-PrOH; (h) [ <i>p</i> -C <sub>8</sub> (NTf <sub>2</sub> ) <sub>2</sub> ]/CHCl <sub>3</sub> ; (i), (j) [ <i>p</i> -C <sub>8</sub> (NTf <sub>2</sub> ) <sub>2</sub> ]/1,4-Diox; (k) [ <i>p</i> -C <sub>12</sub> (NTf <sub>2</sub> ) <sub>2</sub> ]/ACN; (l) [ <i>p</i> -C <sub>12</sub> (NTf <sub>2</sub> ) <sub>2</sub> ]/1-PrOH; (m) [ <i>m</i> -C <sub>12</sub> (NTf <sub>2</sub> ) <sub>2</sub> ]/1-PrOH; (n), (o) [ <i>m</i> -C <sub>12</sub> (NTf <sub>2</sub> ) <sub>2</sub> ]/CHCl <sub>3</sub> .                                                                                                  | <b>S21</b> |
| <b>Fig. S10</b> Fluorescence spectra in solution (red line) and in solid state (blue line) corresponding to: (a) [ <i>p</i> -C <sub>8</sub> Br <sub>2</sub> ] in ACN; (b) [ <i>p</i> -C <sub>8</sub> Br <sub>2</sub> ] in THF; (c) [ <i>p</i> -C <sub>12</sub> Br <sub>2</sub> ] in 1-PrOH; (d) [ <i>p</i> -C <sub>12</sub> Br <sub>2</sub> ] in 2-PrOH; (e) [ <i>p</i> -C <sub>12</sub> Br <sub>2</sub> ] in CHCl <sub>3</sub> ; (f) [ <i>p</i> -C <sub>8</sub> (NTf <sub>2</sub> ) <sub>2</sub> ] in 2-PrOH; (g) [ <i>p</i> -C <sub>8</sub> (NTf <sub>2</sub> ) <sub>2</sub> ] in CHCl <sub>3</sub> ; (h) [ <i>p</i> -C <sub>8</sub> (NTf <sub>2</sub> ) <sub>2</sub> ] in 1,4-Diox; (i) [ <i>p</i> -C <sub>12</sub> (NTf <sub>2</sub> ) <sub>2</sub> ] in ACN; (j) [ <i>p</i> -C <sub>12</sub> (NTf <sub>2</sub> ) <sub>2</sub> ] in 1-PrOH; (k) [ <i>p</i> -C <sub>12</sub> (NTf <sub>2</sub> ) <sub>2</sub> ] in THF.                                                                                           | <b>S23</b> |
| <b>Fig. S11</b> (a) Solution and (b) deconvoluted solid state spectra for [ <i>p</i> -C <sub>12</sub> (NTf <sub>2</sub> ) <sub>2</sub> ] in 1-PrOH.                                                                                                                                                                                                                                                                                                                                                                                                                                                                                                                                                                                                                                                                                                                                                                                                                                                                  | <b>S25</b> |
| <b>Table S1</b> RLS Intensity at 378 nm as function of salt and solvent nature ([salt] = 1·10 <sup>-4</sup> M)                                                                                                                                                                                                                                                                                                                                                                                                                                                                                                                                                                                                                                                                                                                                                                                                                                                                                                       | <b>S25</b> |
| <b>Table S2</b> Estimated size of solvent molecules on the base of DFT geometries and AMBER atomic radii                                                                                                                                                                                                                                                                                                                                                                                                                                                                                                                                                                                                                                                                                                                                                                                                                                                                                                             | <b>S25</b> |
| <b>Table S3</b> $\lambda_{MAX}$ and $\Delta\lambda$ values detected for fluorescence spectra recorded in solution and solid state at 1·10 <sup>-4</sup> M.                                                                                                                                                                                                                                                                                                                                                                                                                                                                                                                                                                                                                                                                                                                                                                                                                                                           | <b>S26</b> |

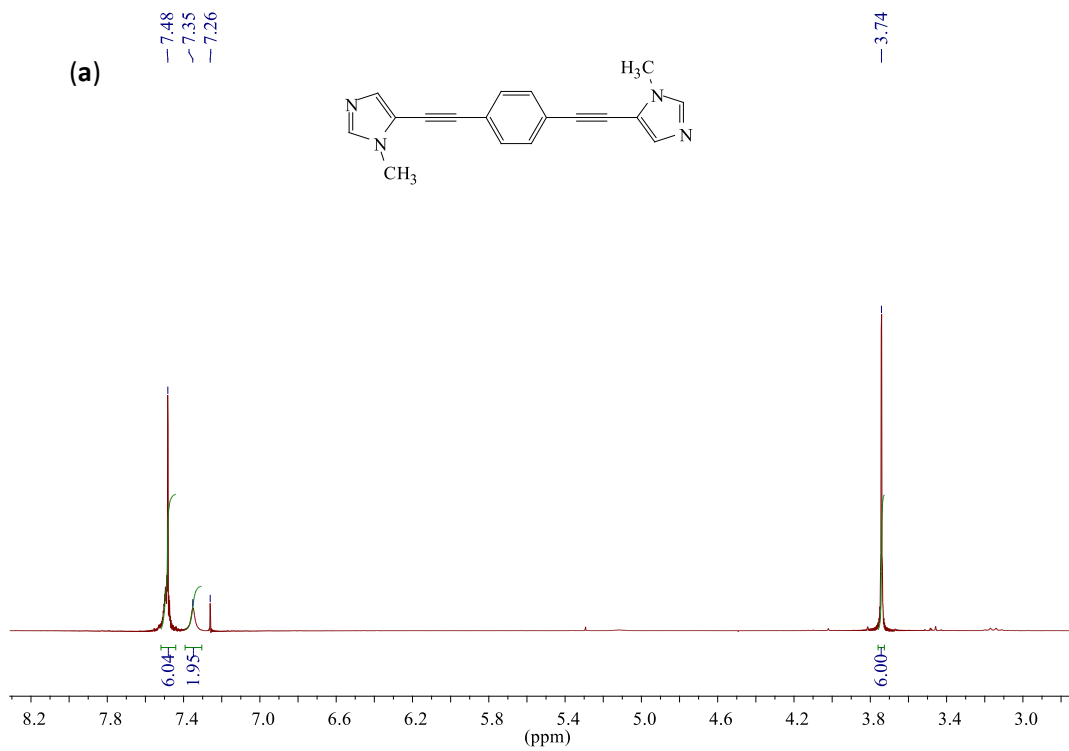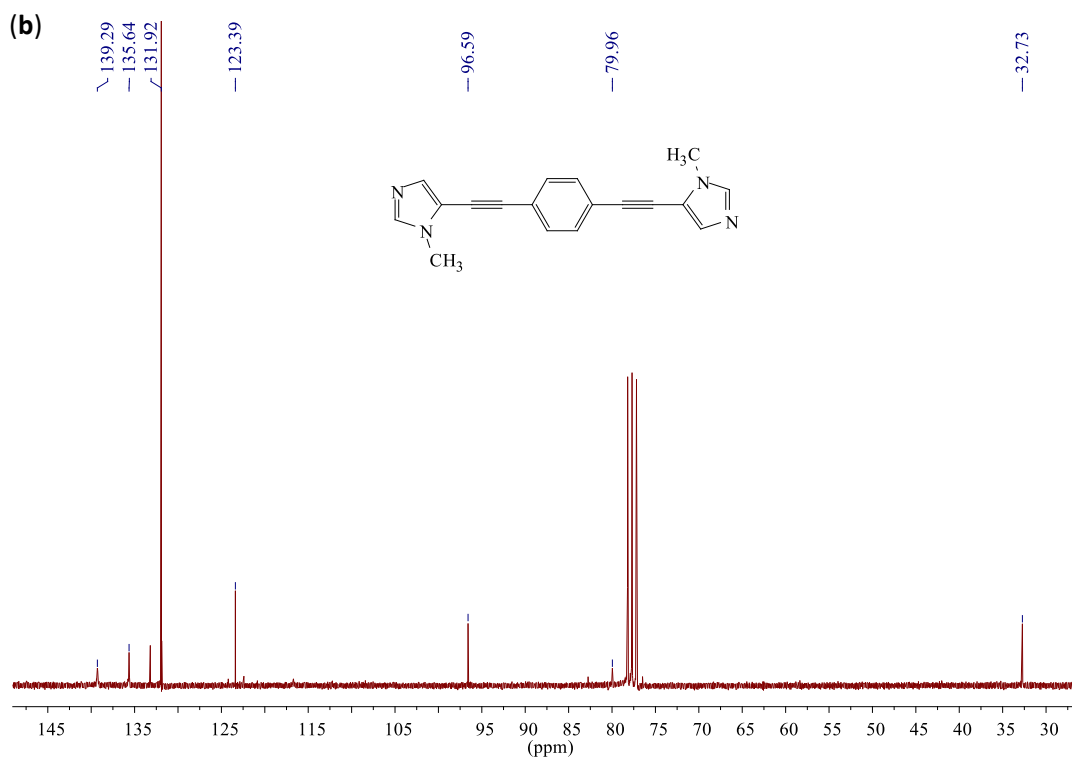

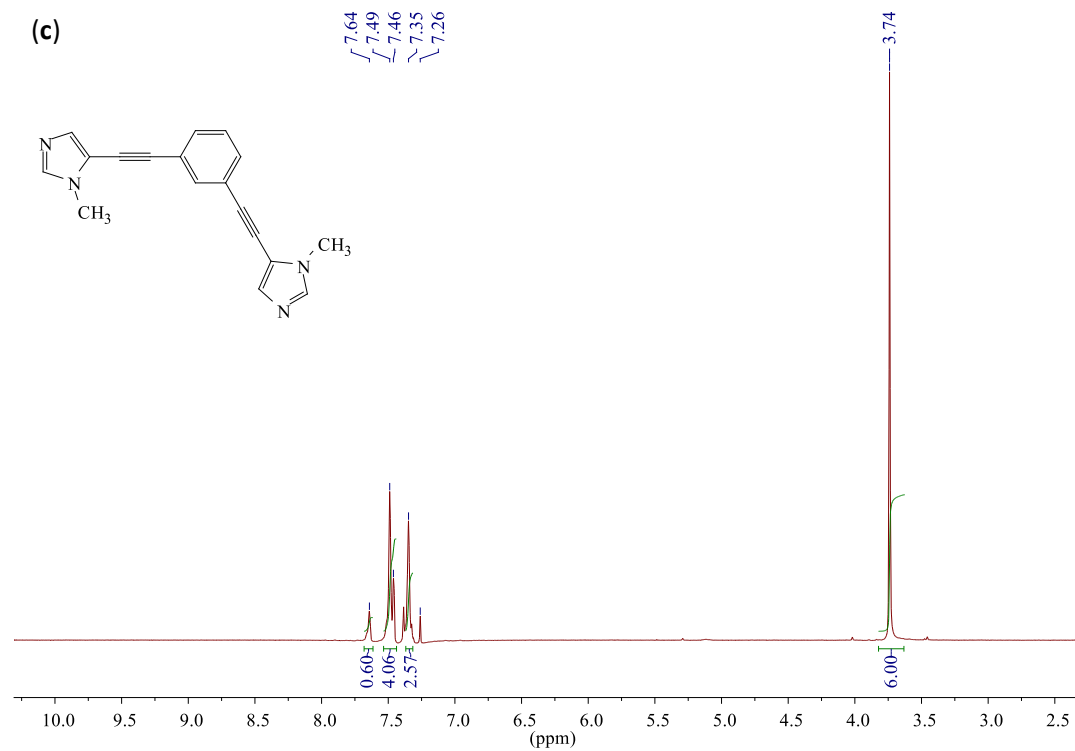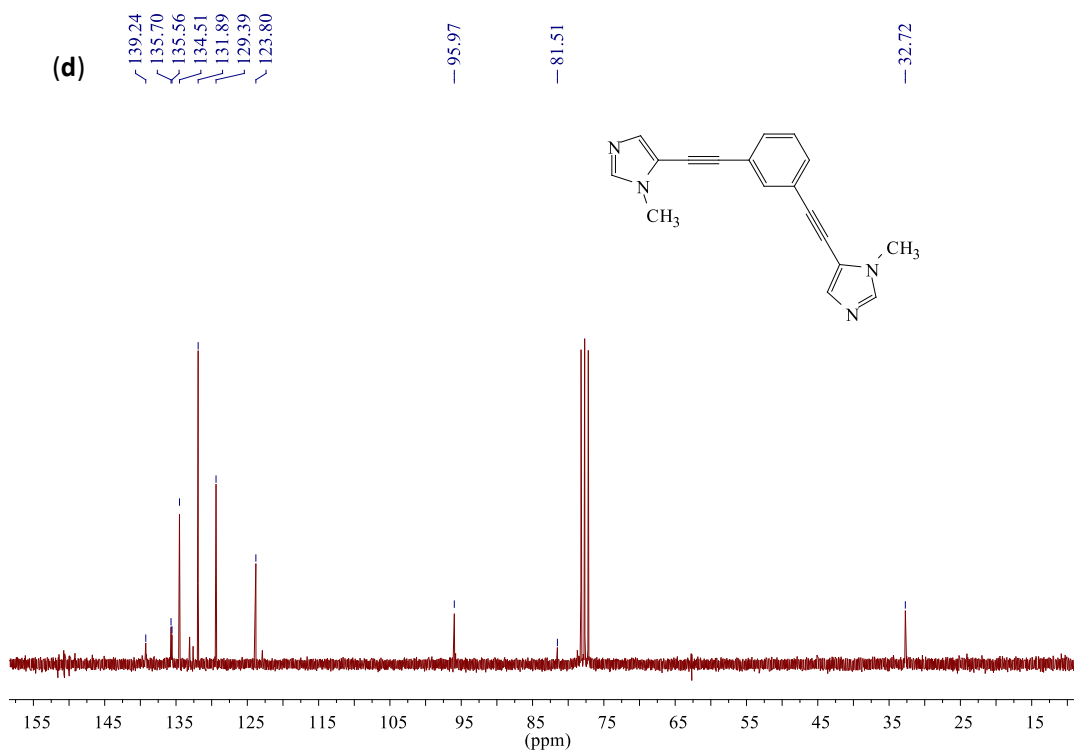

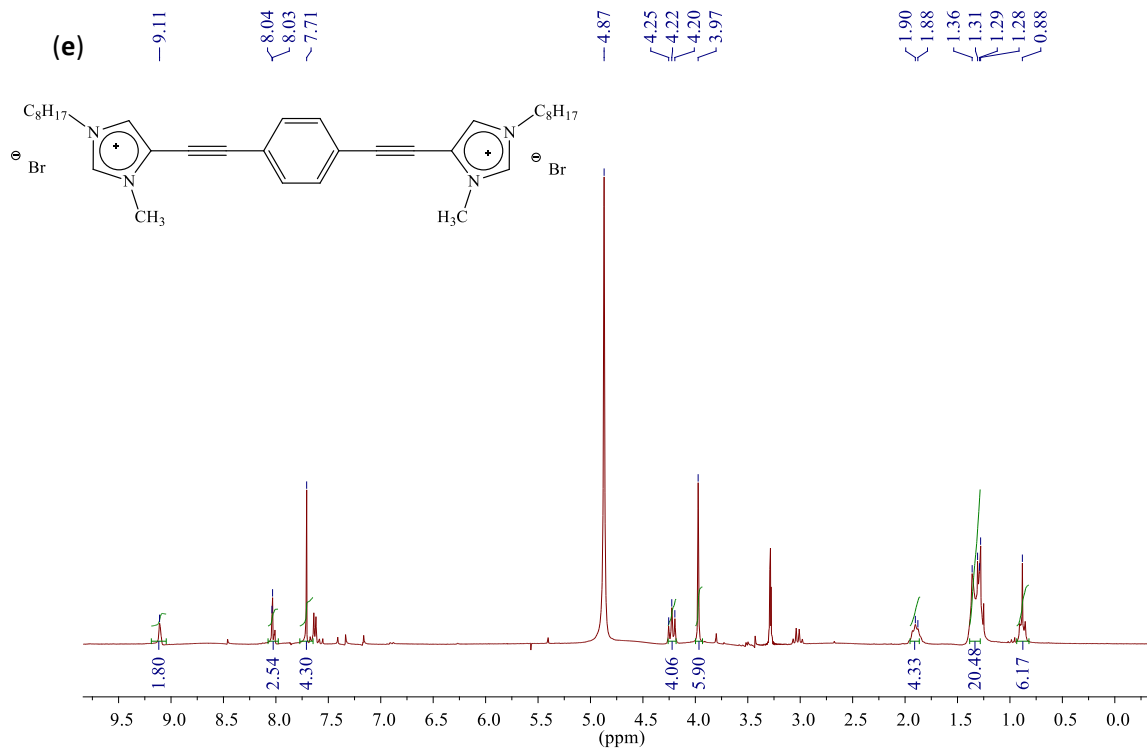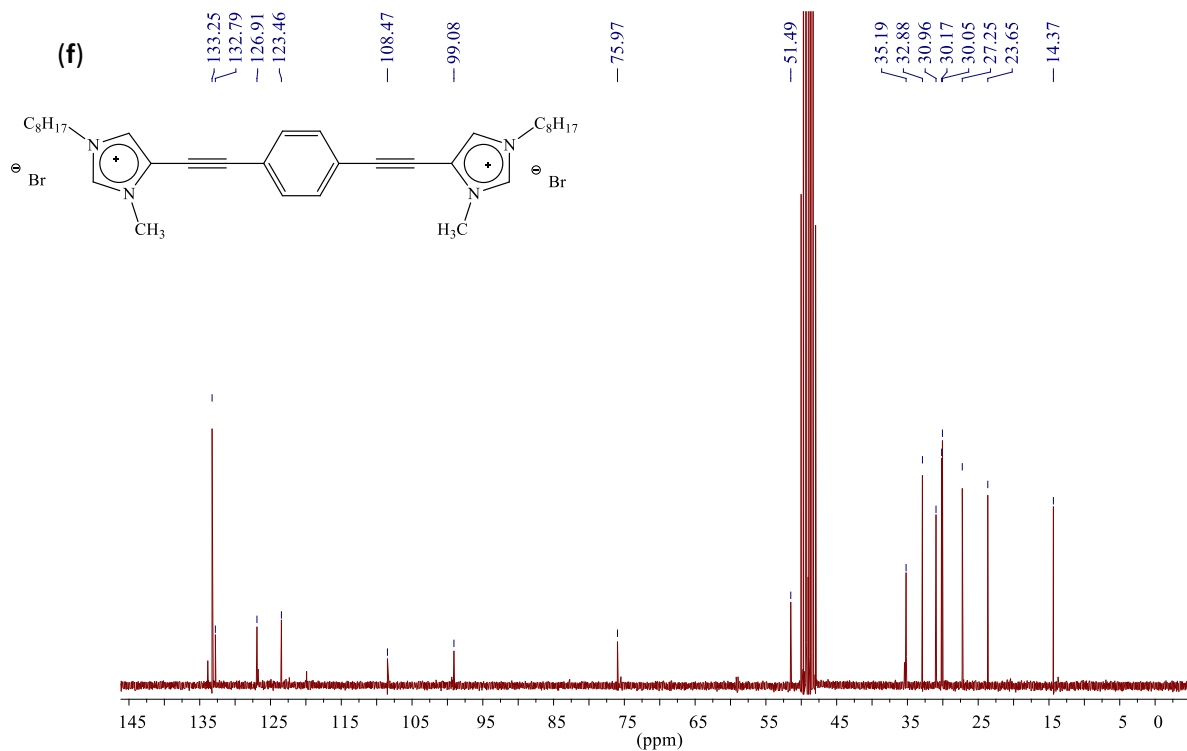

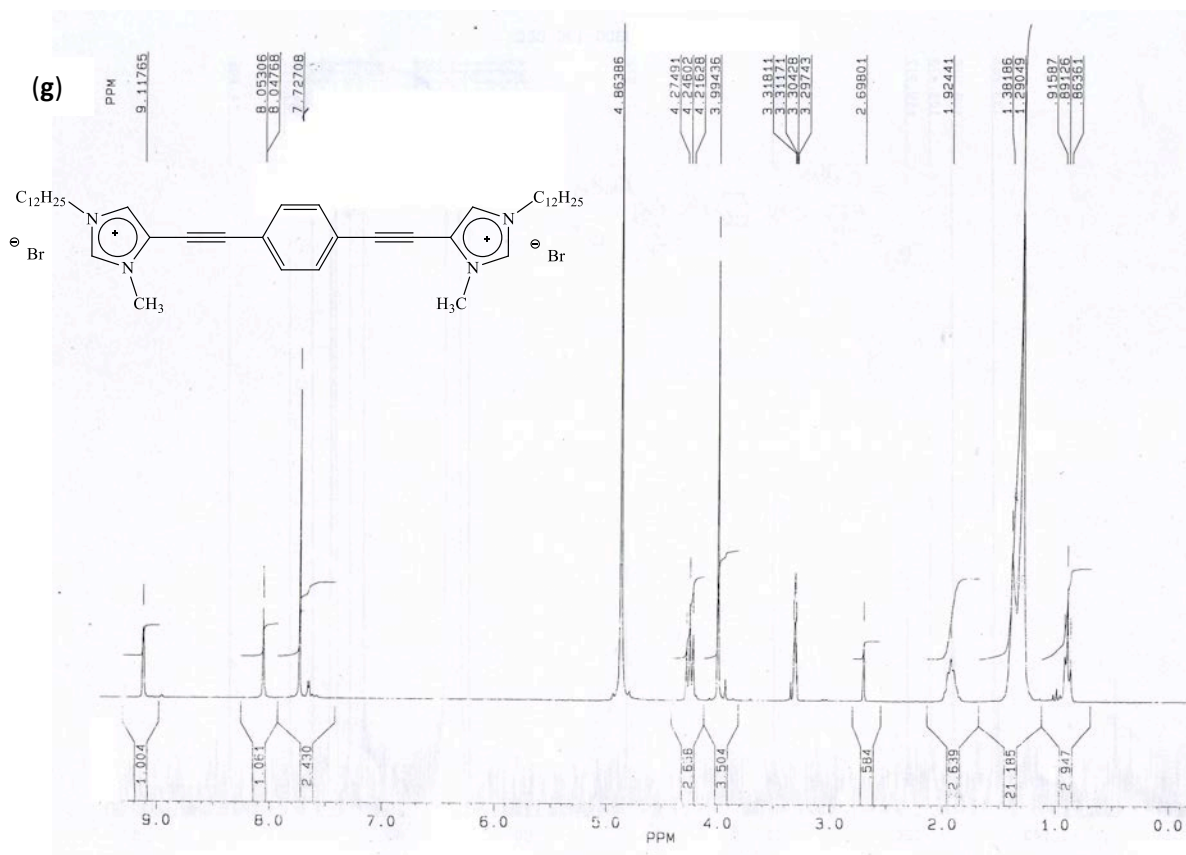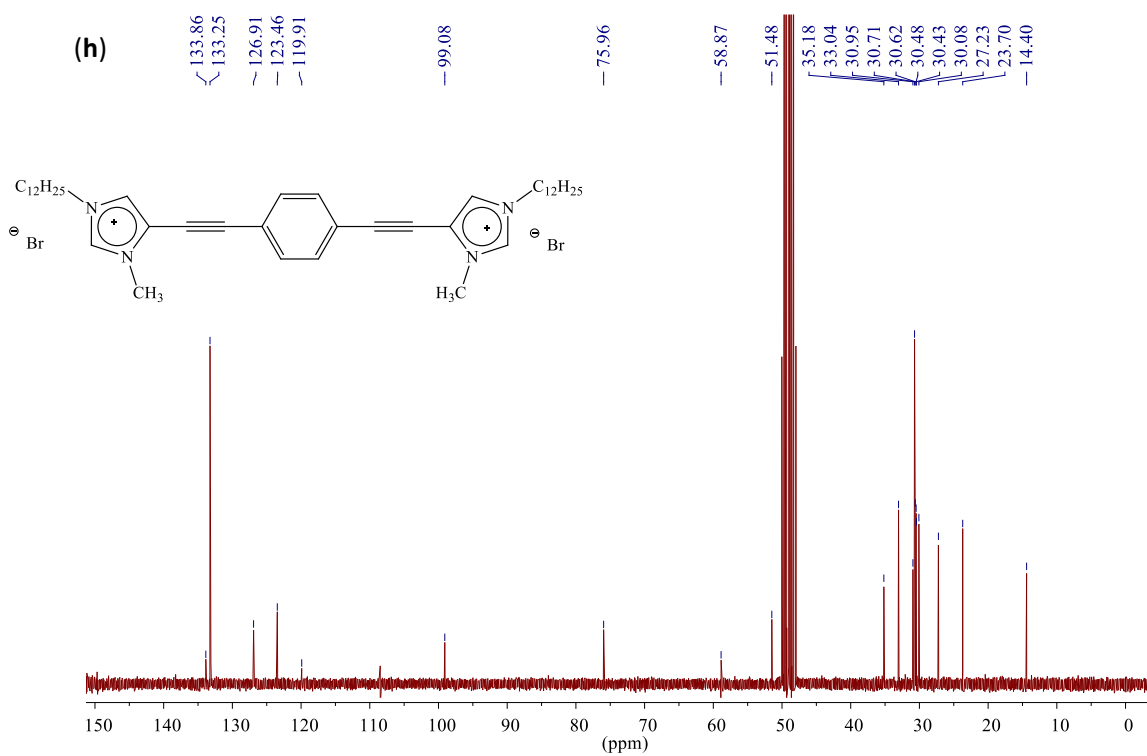

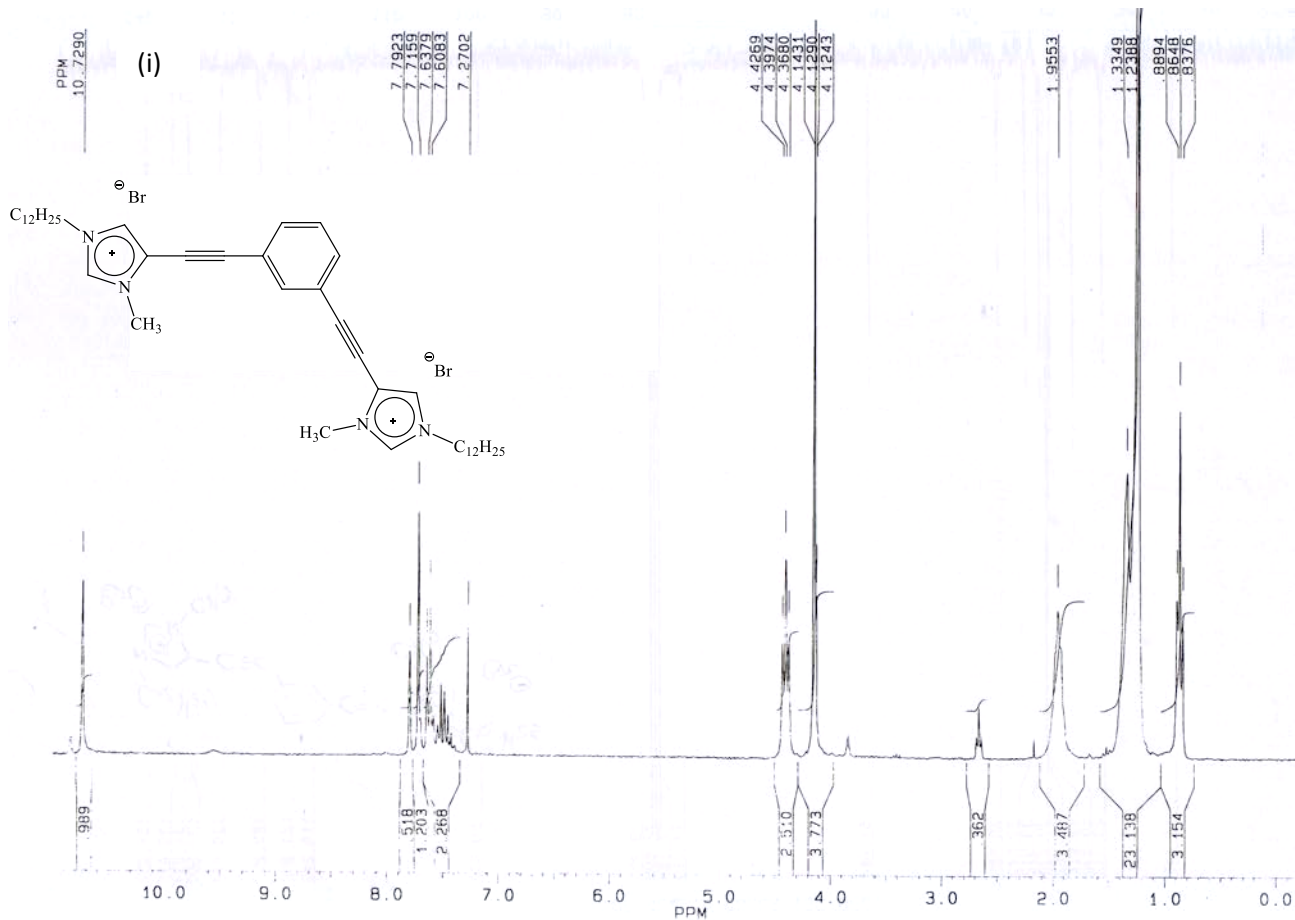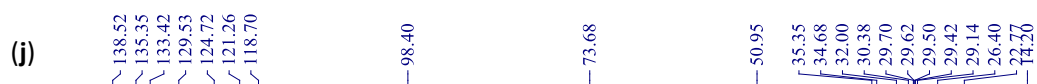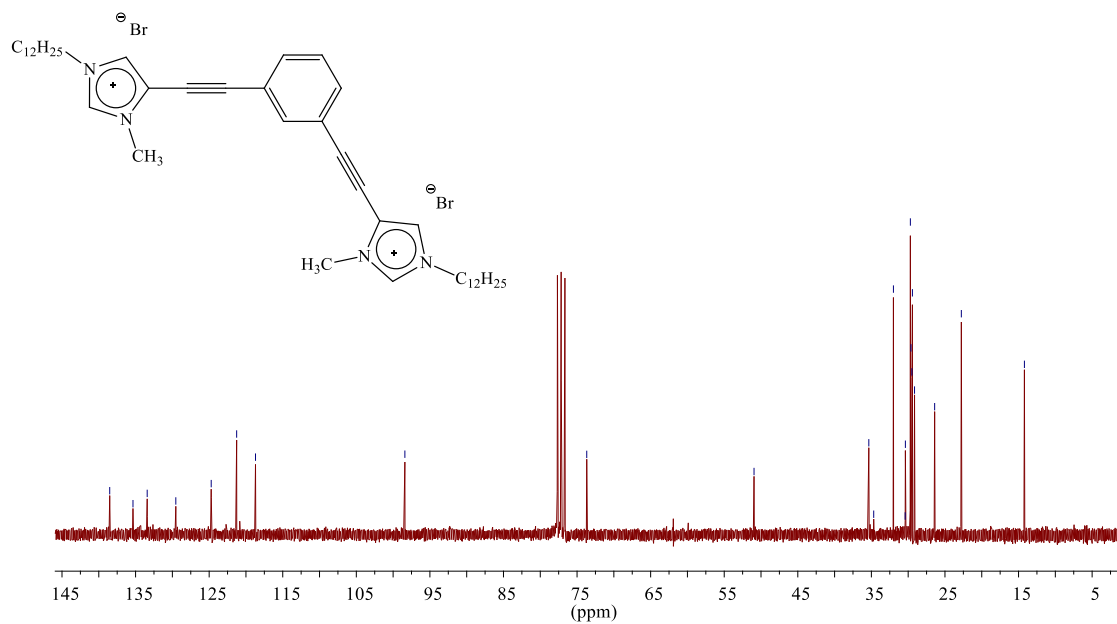

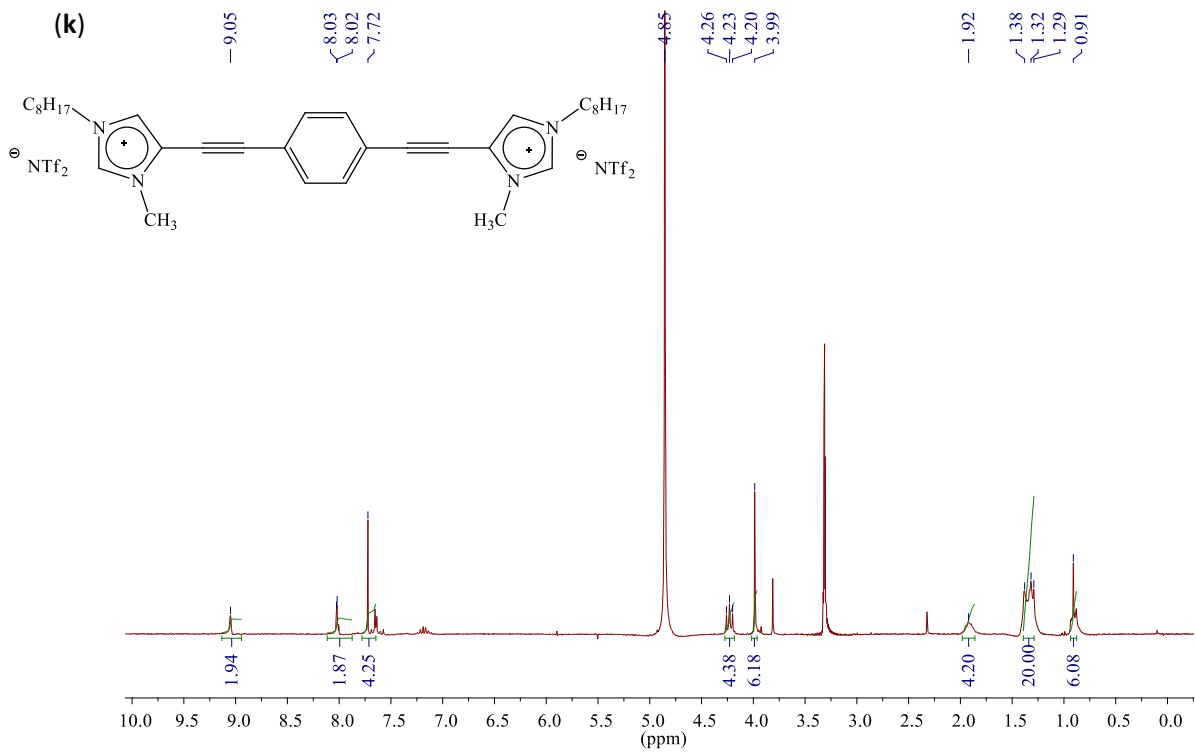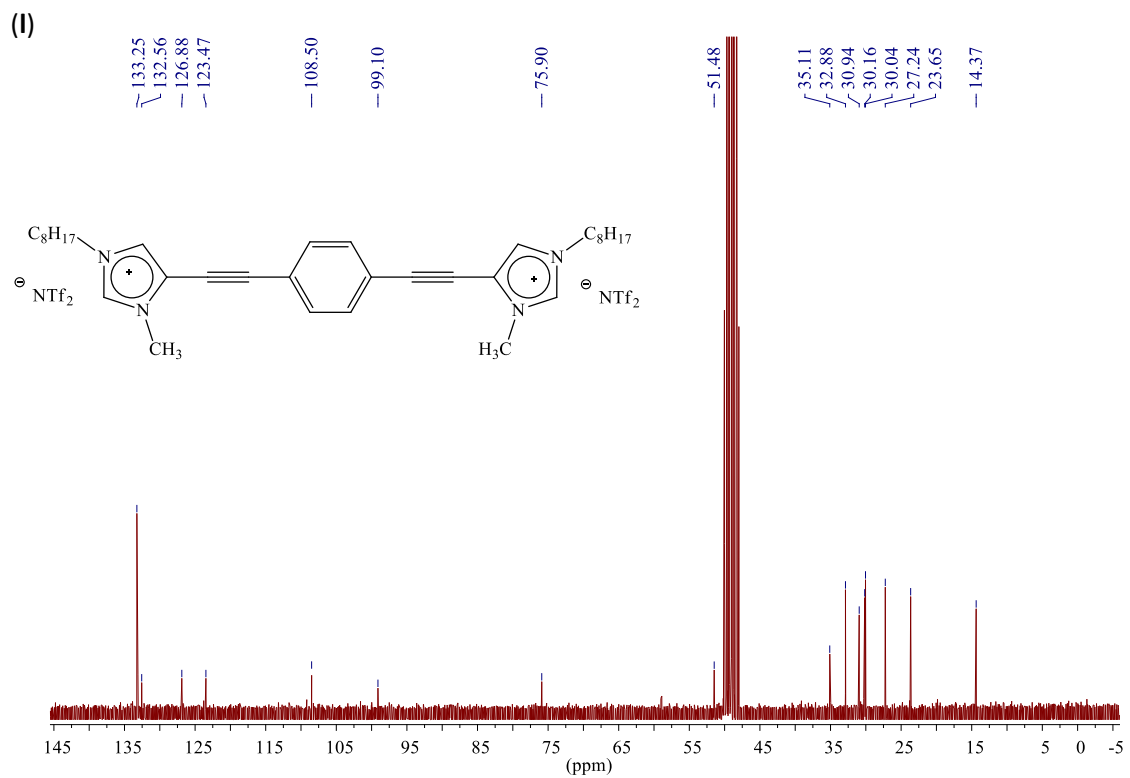



(m)

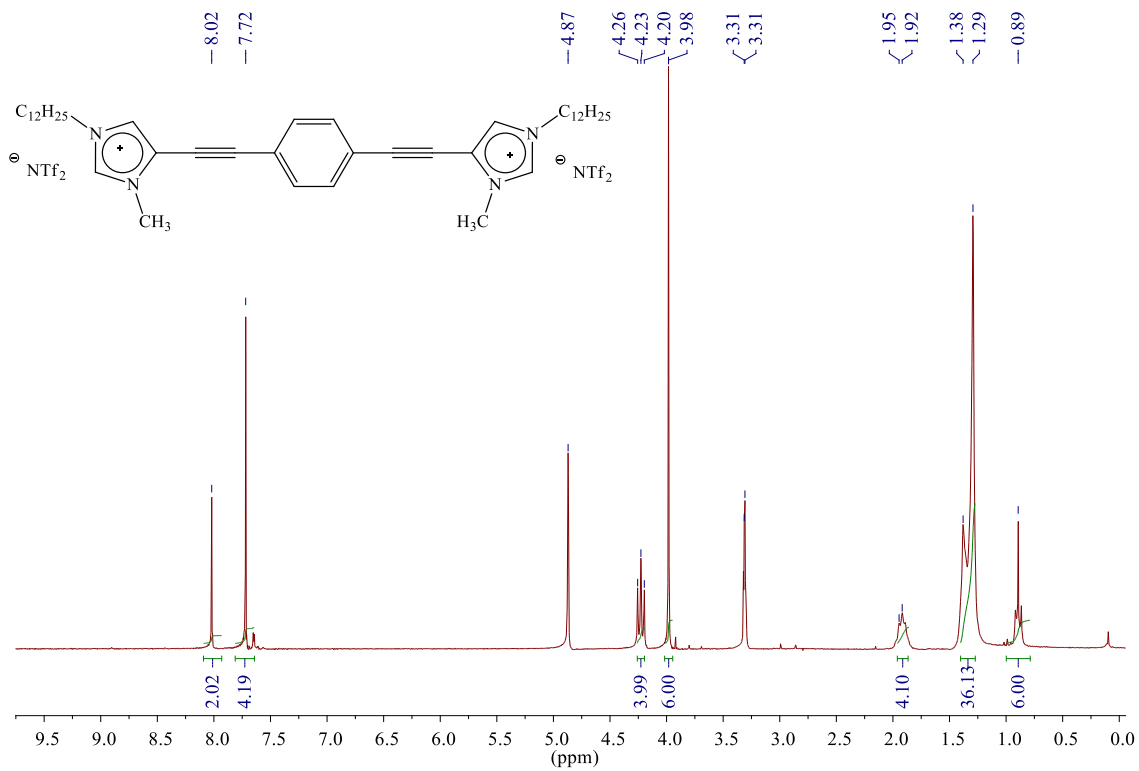

(n)

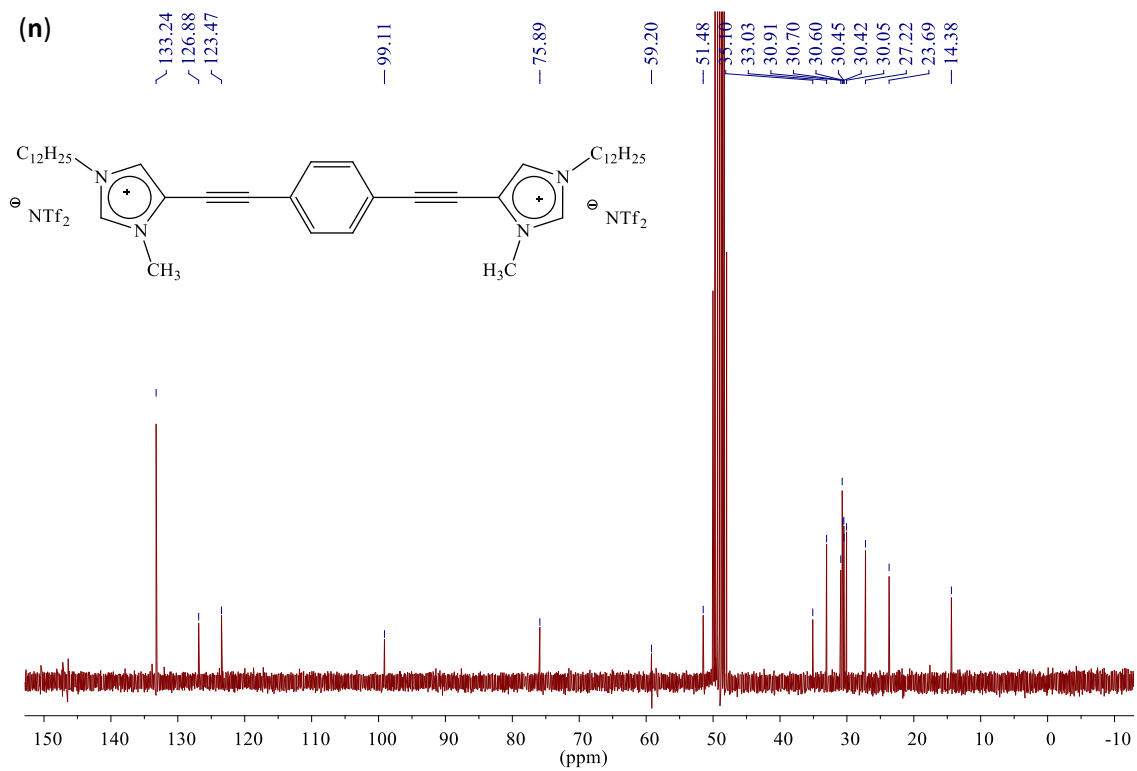

(o)

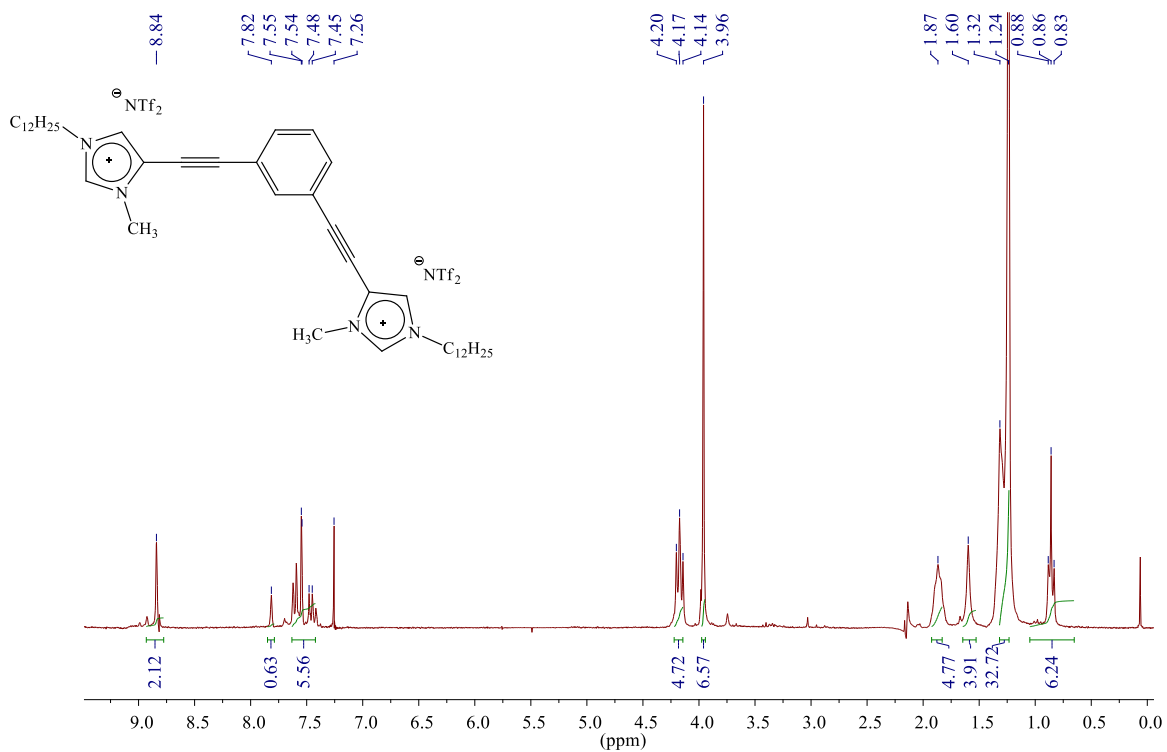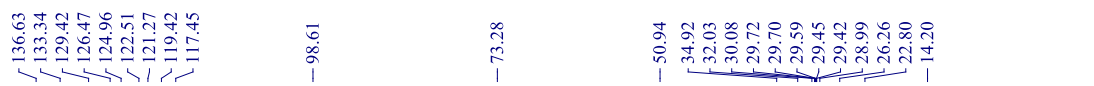

(p)

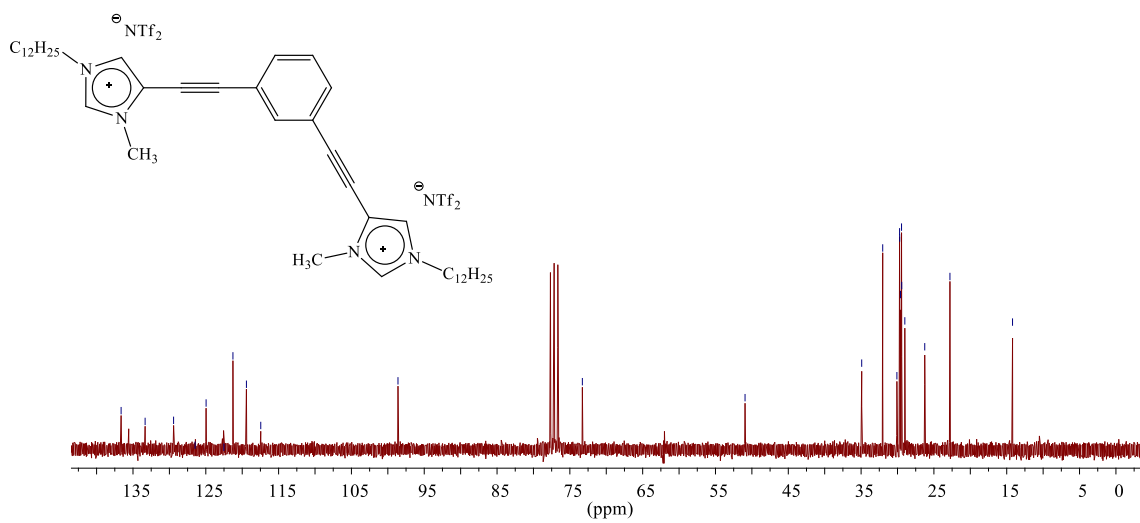

**Fig. S1**  $^1\text{H}$  NMR and  $^{13}\text{C}$  NMR spectra corresponding to: (a), (b) **1**; (c), (d) **2**; (e), (f) [*p*-C<sub>8</sub>Br<sub>2</sub>]; (g), (h) [*p*-C<sub>12</sub>Br<sub>2</sub>]; (i), (j) [*m*-C<sub>12</sub>Br<sub>2</sub>]; (k), (l) [*p*-C<sub>8</sub>(NTf<sub>2</sub>)<sub>2</sub>]; (m), (n) [*p*-C<sub>12</sub>(NTf<sub>2</sub>)<sub>2</sub>] and (o), (p) [*m*-C<sub>12</sub>(NTf<sub>2</sub>)<sub>2</sub>].

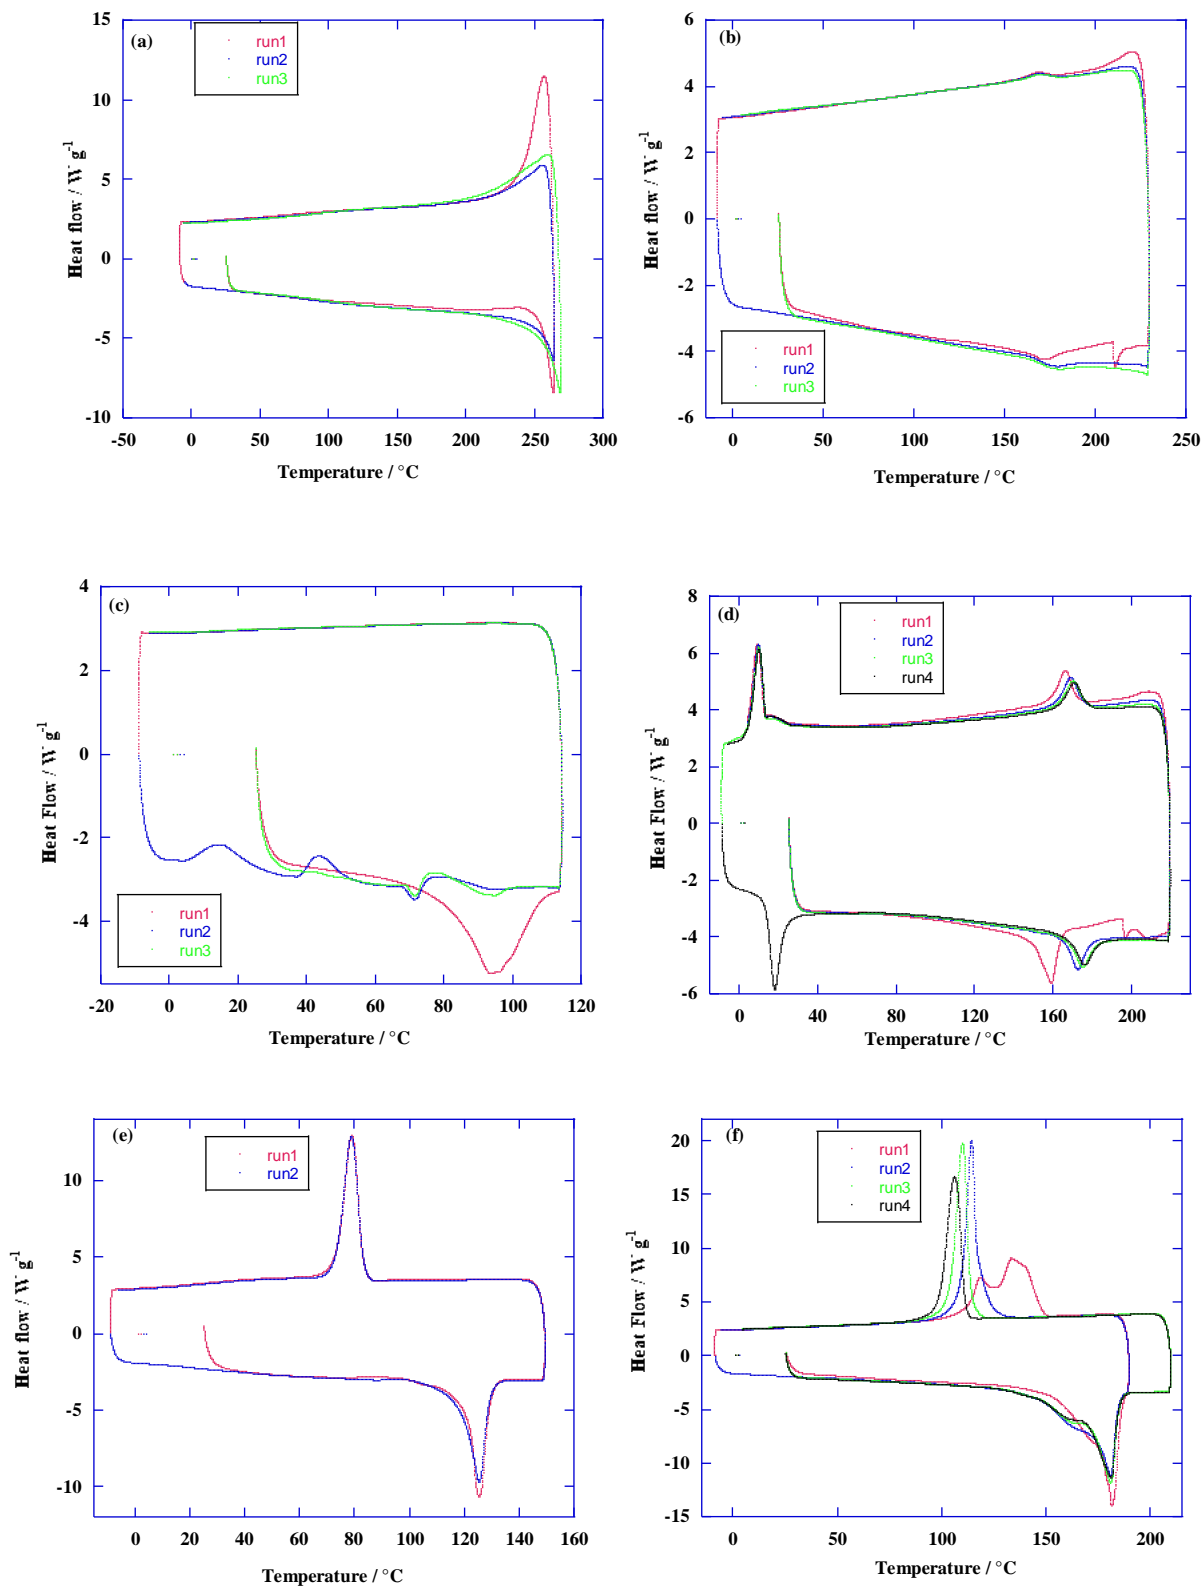

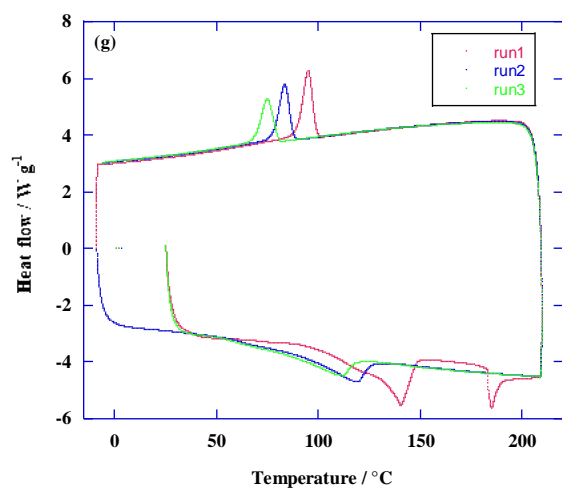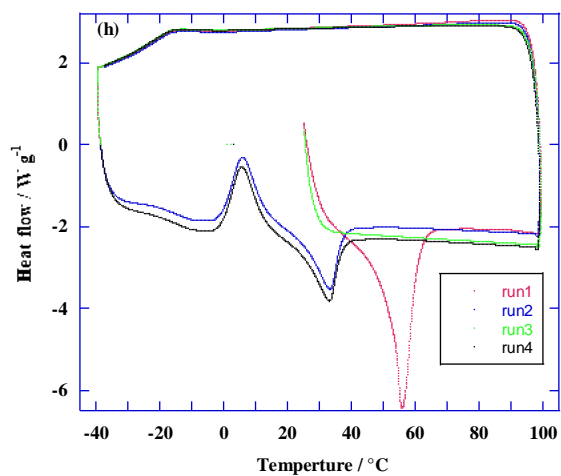

**Fig. S2** DSC traces corresponding to: (a) **1**; (b)  $[p\text{-C}_8\text{Br}_2]$ ; (c)  $[p\text{-C}_8(\text{NTf}_2)_2]$ ; (d)  $[p\text{-C}_{12}\text{Br}_2]$ ; (e)  $[p\text{-C}_{12}(\text{NTf}_2)_2]$ ; (f) **2**; (g)  $[m\text{-C}_{12}\text{Br}_2]$ ; (h)  $[m\text{-C}_{12}(\text{NTf}_2)_2]$  (exo up).

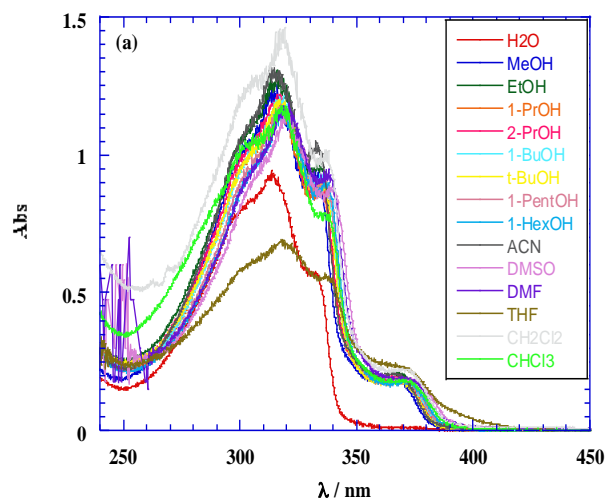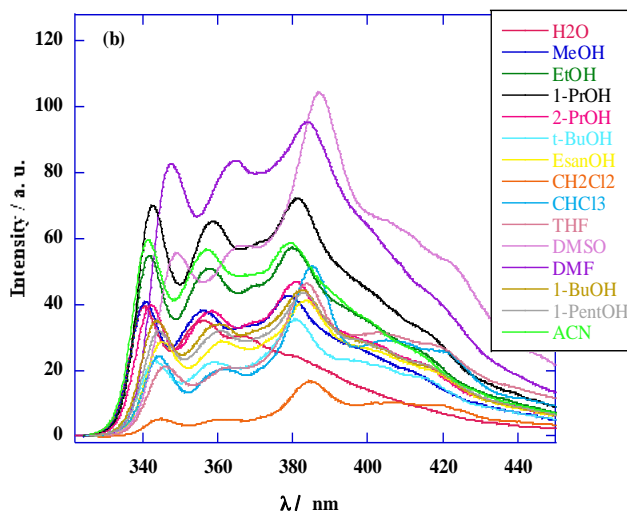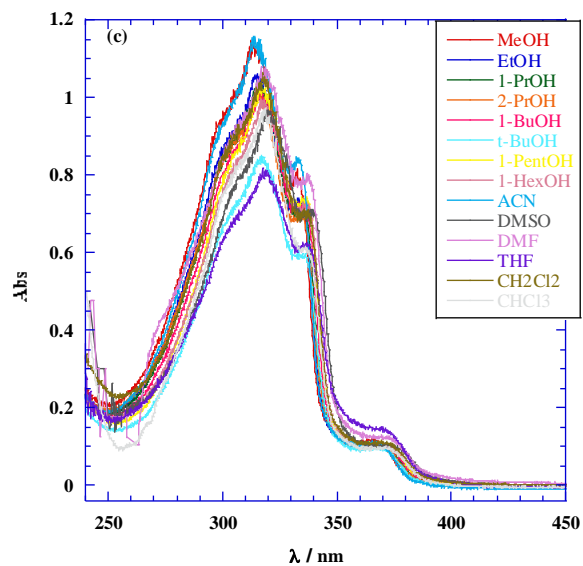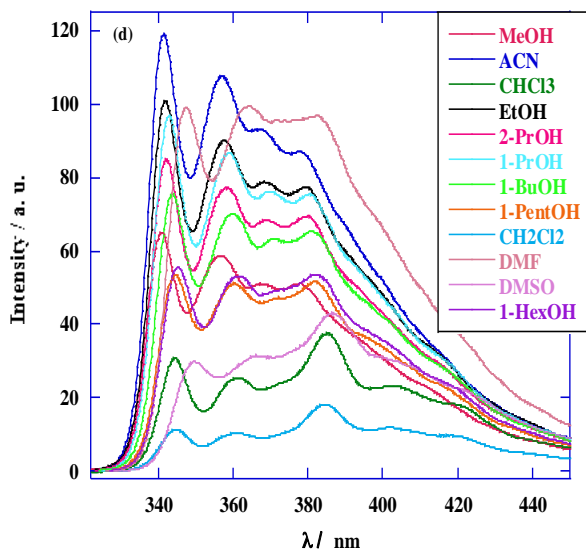

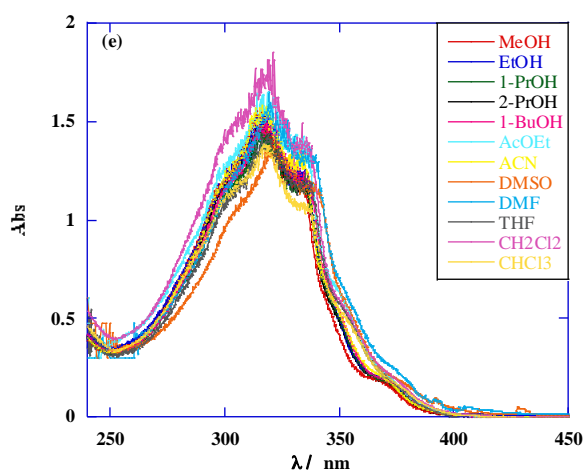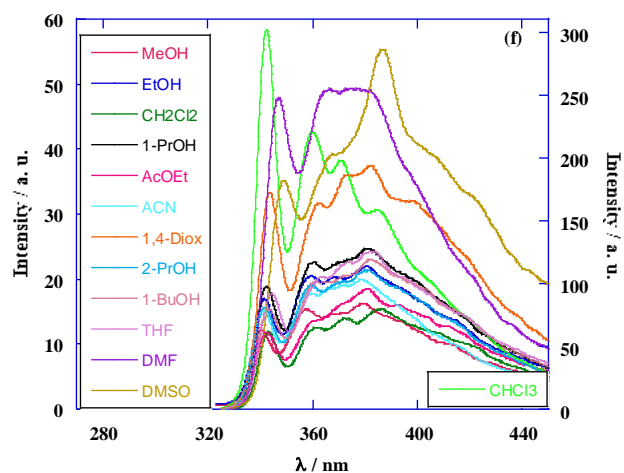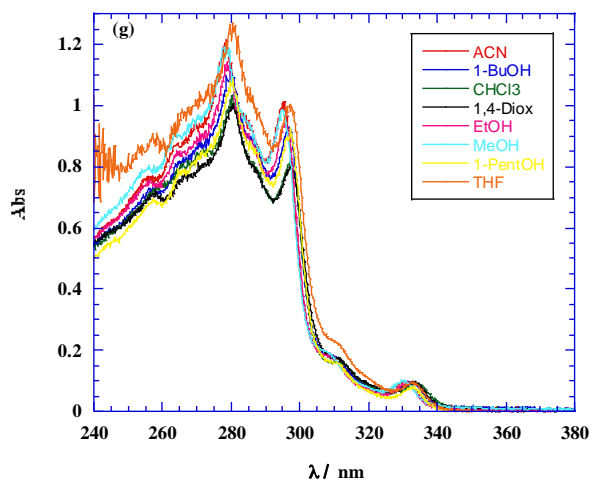

**Fig. S3** UV-vis and fluorescence spectra recorded in different solvents at 298 K for: (a) and (b)  $[p-C_8Br_2]$ ; (c) and (d)  $[p-C_{12}Br_2]$ ; (e) and (f)  $[p-C_8(NTf_2)_2]$ ; (g)  $[m-C_{12}(NTf_2)_2]$ .

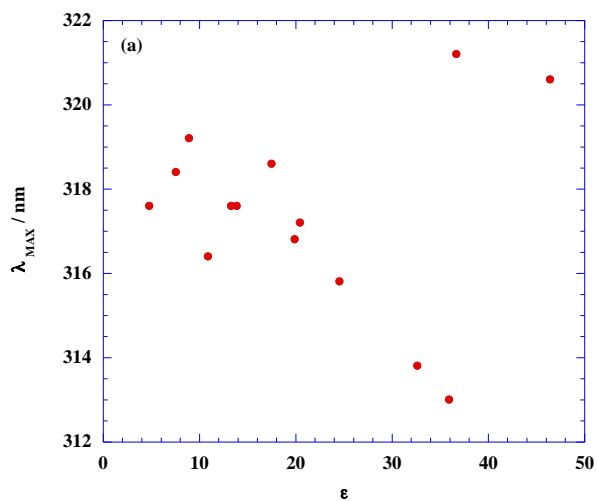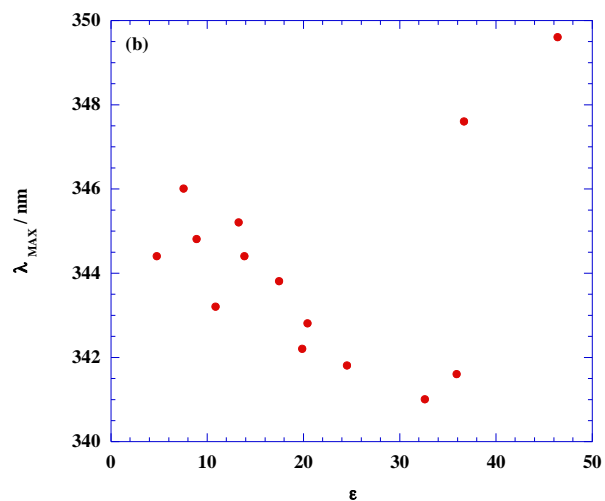

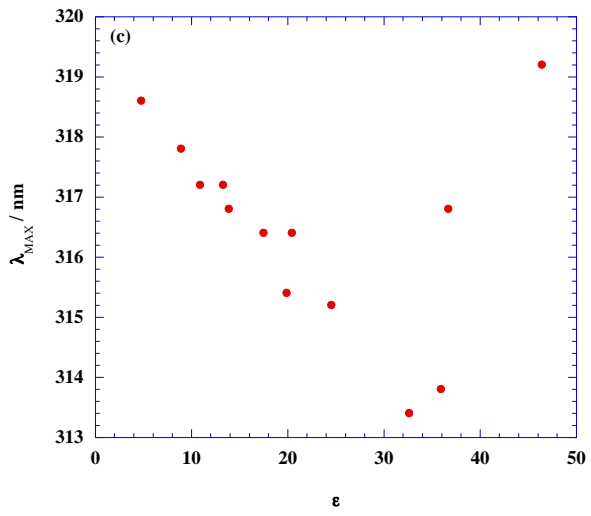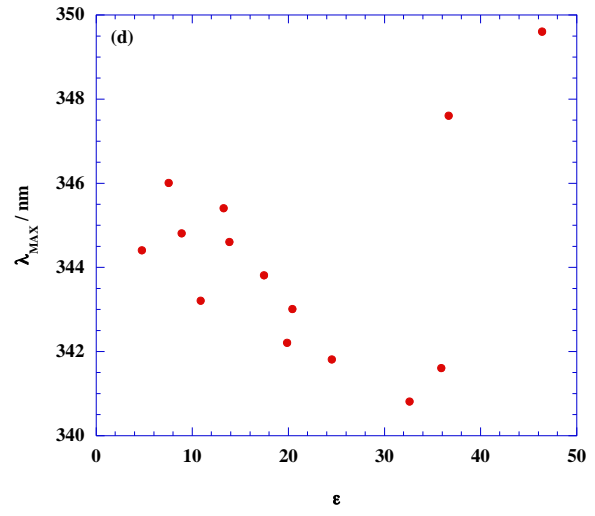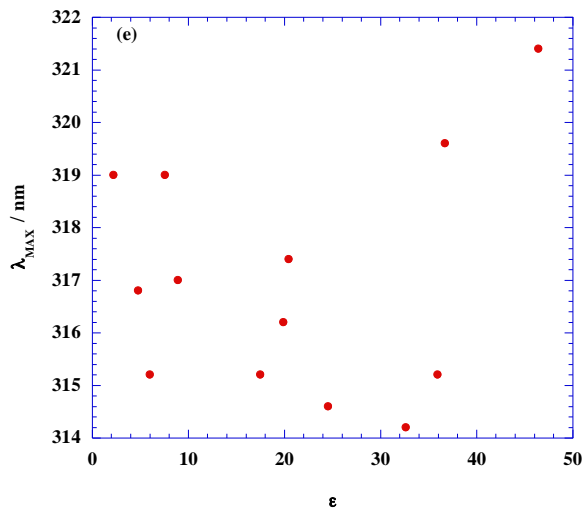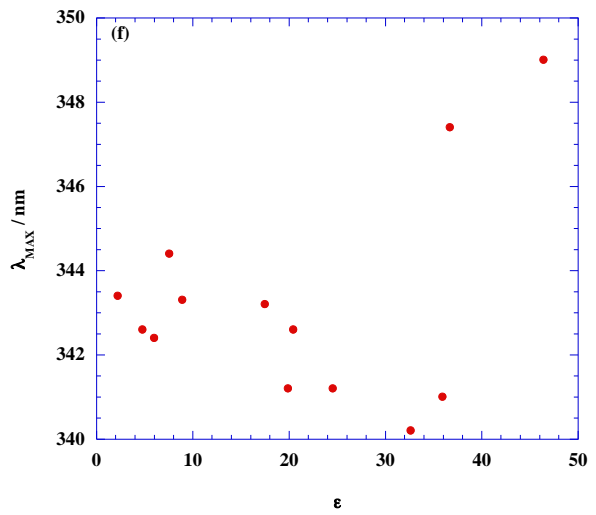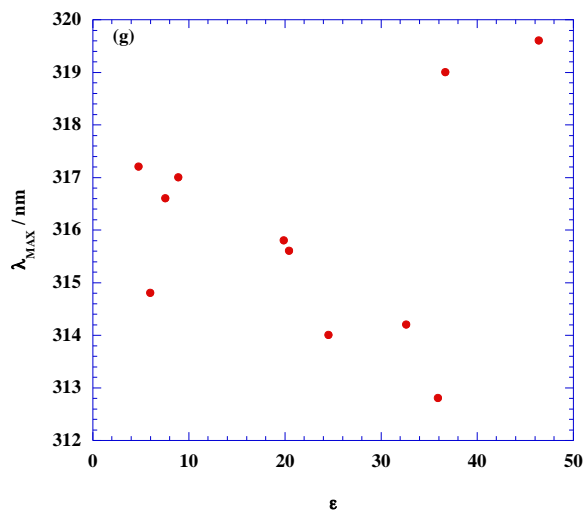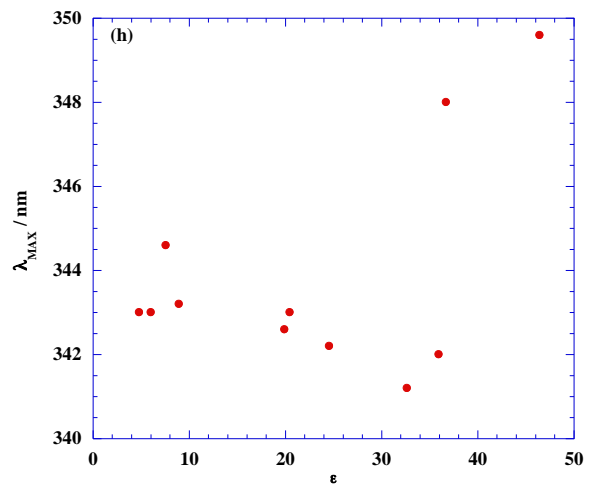

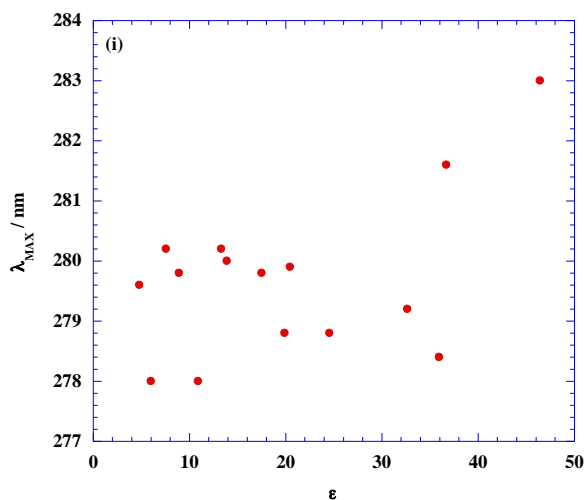

**Fig. S4** Plots of UV-vis and fluorescence maxima ( $\lambda_{MAX}$ ) recorded in different solvents at 298 K for: (a) and (b)  $[p\text{-C}_8\text{Br}_2]$ ; (c) and (d)  $[p\text{-C}_{12}\text{Br}_2]$ ; (e) and (f)  $[p\text{-C}_8(\text{NTf}_2)_2]$ ; (g) and (h)  $[p\text{-C}_{12}(\text{NTf}_2)_2]$ ; (i)  $m\text{-C}_{12}(\text{NTf}_2)_2$ .

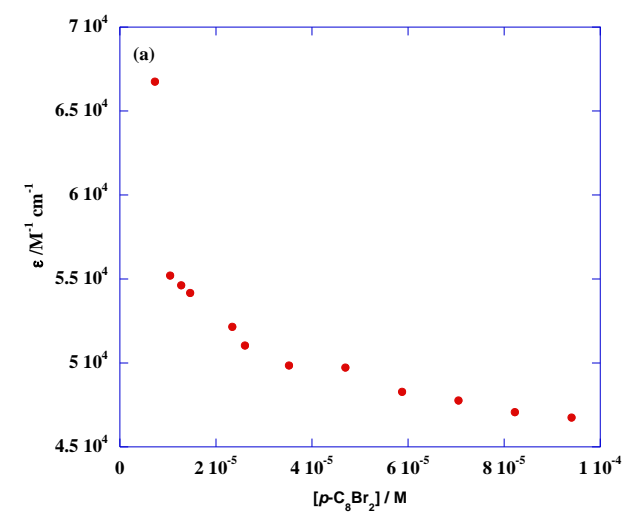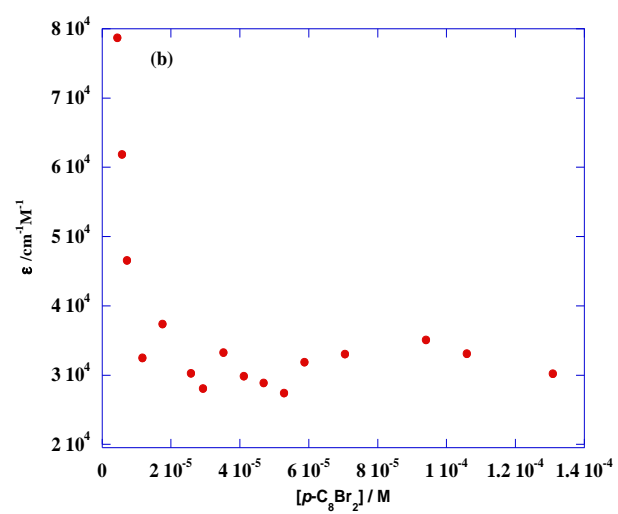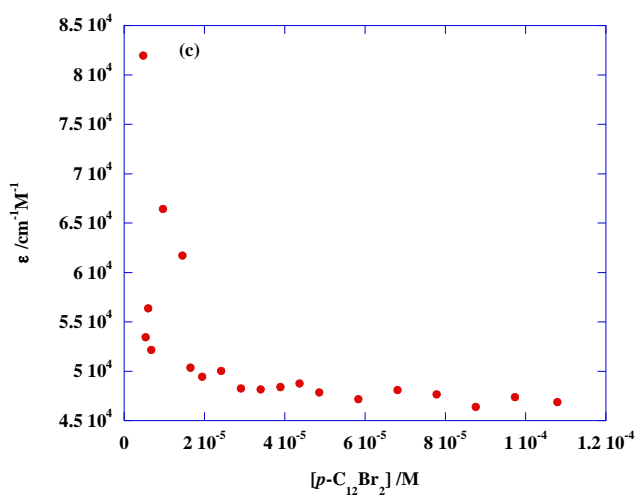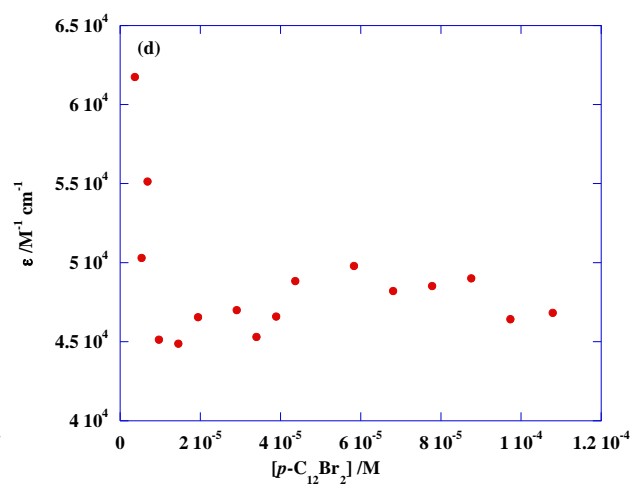

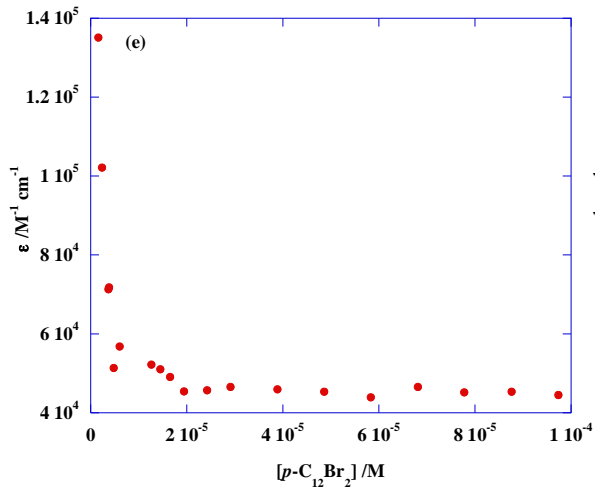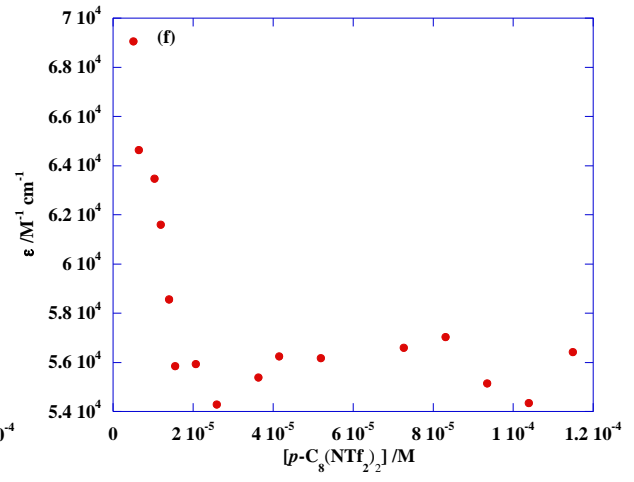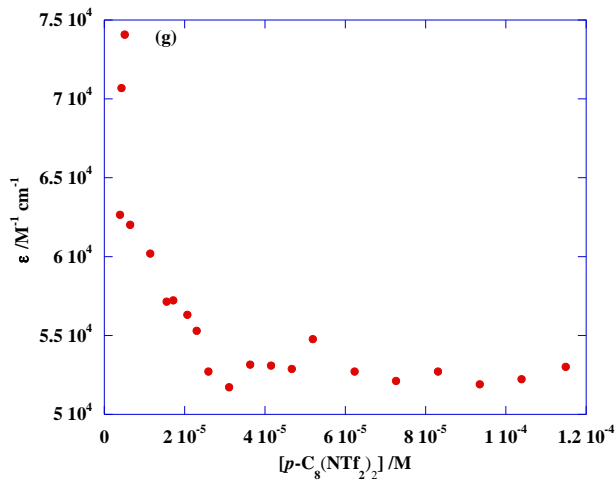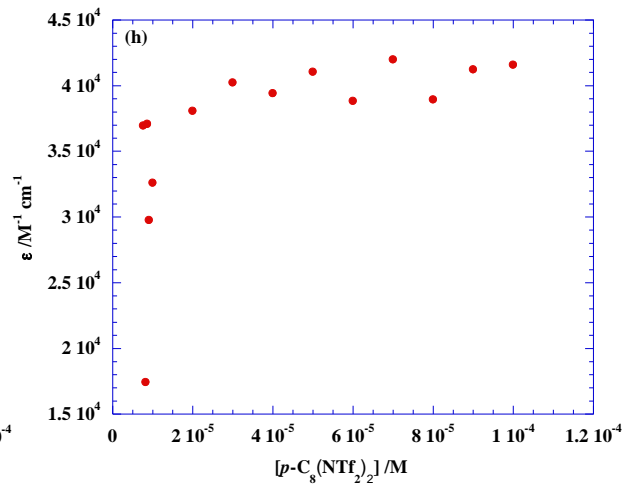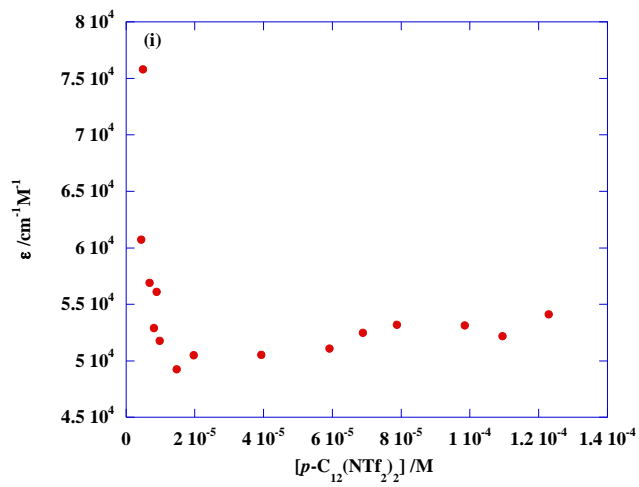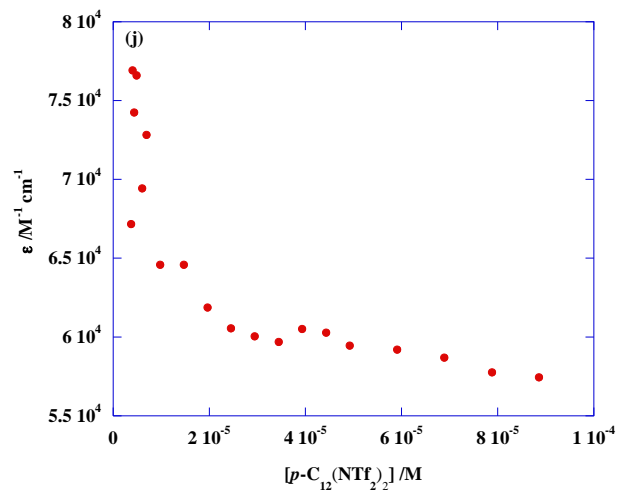



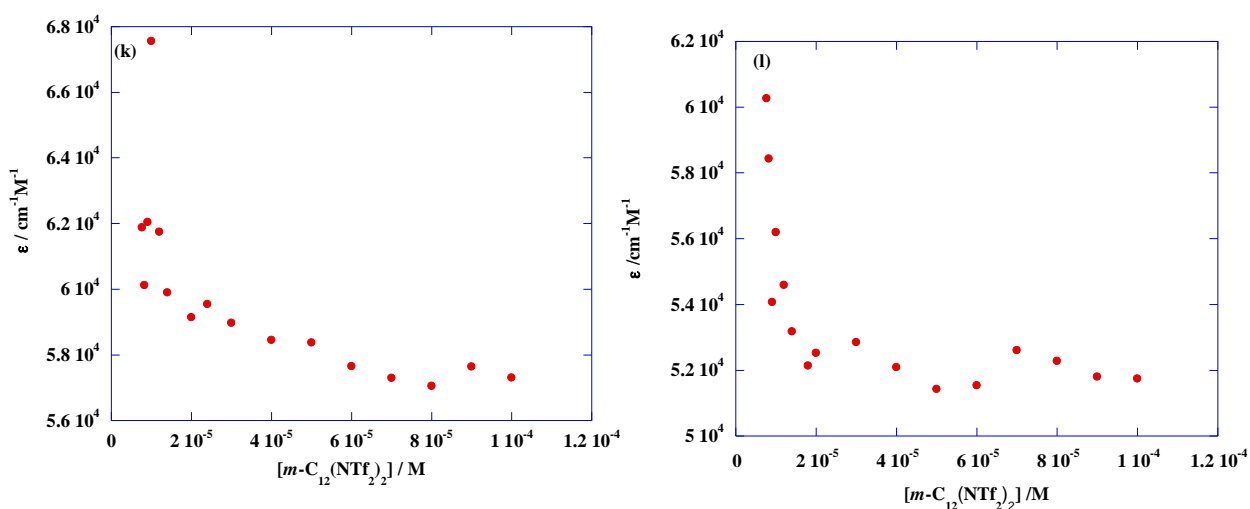

**Fig. S5** Plots of apparent absorption coefficient as a function of salt concentration corresponding to: (a)  $[p\text{-C}_8\text{Br}_2]$  in ACN; (b)  $[p\text{-C}_8\text{Br}_2]$  in THF; (c)  $[p\text{-C}_{12}\text{Br}_2]$  in 1-PrOH; (d)  $[p\text{-C}_{12}\text{Br}_2]$  in 2-PrOH; (e)  $[p\text{-C}_{12}\text{Br}_2]$  in  $\text{CHCl}_3$ ; (f)  $[p\text{-C}_8(\text{NTf}_2)_2]$  in 2-PrOH; (g)  $[p\text{-C}_8(\text{NTf}_2)_2]$  in  $\text{CHCl}_3$ ; (h)  $[p\text{-C}_8(\text{NTf}_2)_2]$  in 1,4-Diox; (i)  $[p\text{-C}_{12}(\text{NTf}_2)_2]$  in ACN; (j)  $[p\text{-C}_{12}(\text{NTf}_2)_2]$  in THF; (k)  $[m\text{-C}_{12}(\text{NTf}_2)_2]$  in 1-PrOH; (l)  $[m\text{-C}_{12}(\text{NTf}_2)_2]$  in  $\text{CHCl}_3$ .

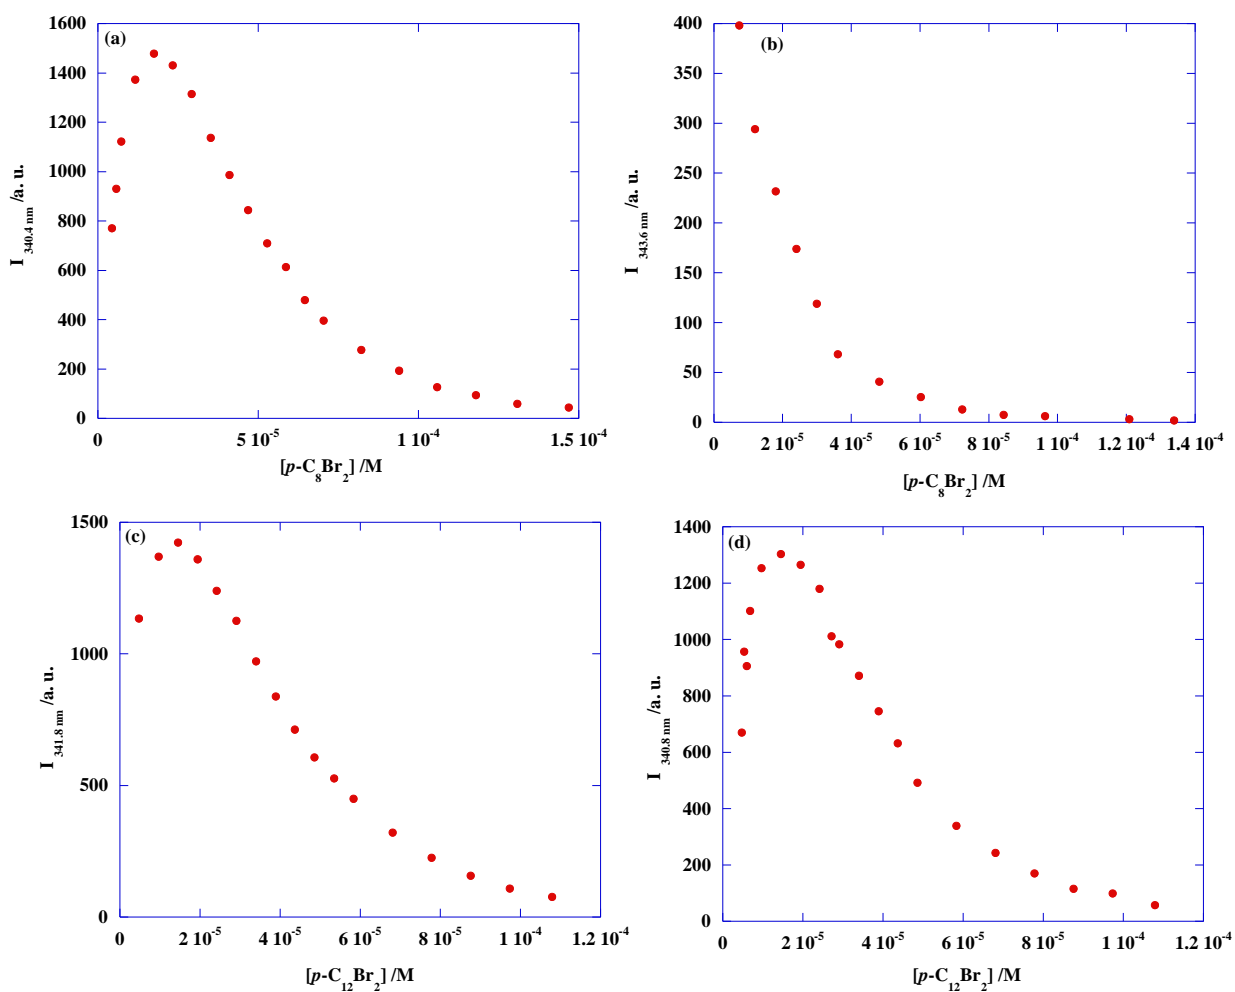

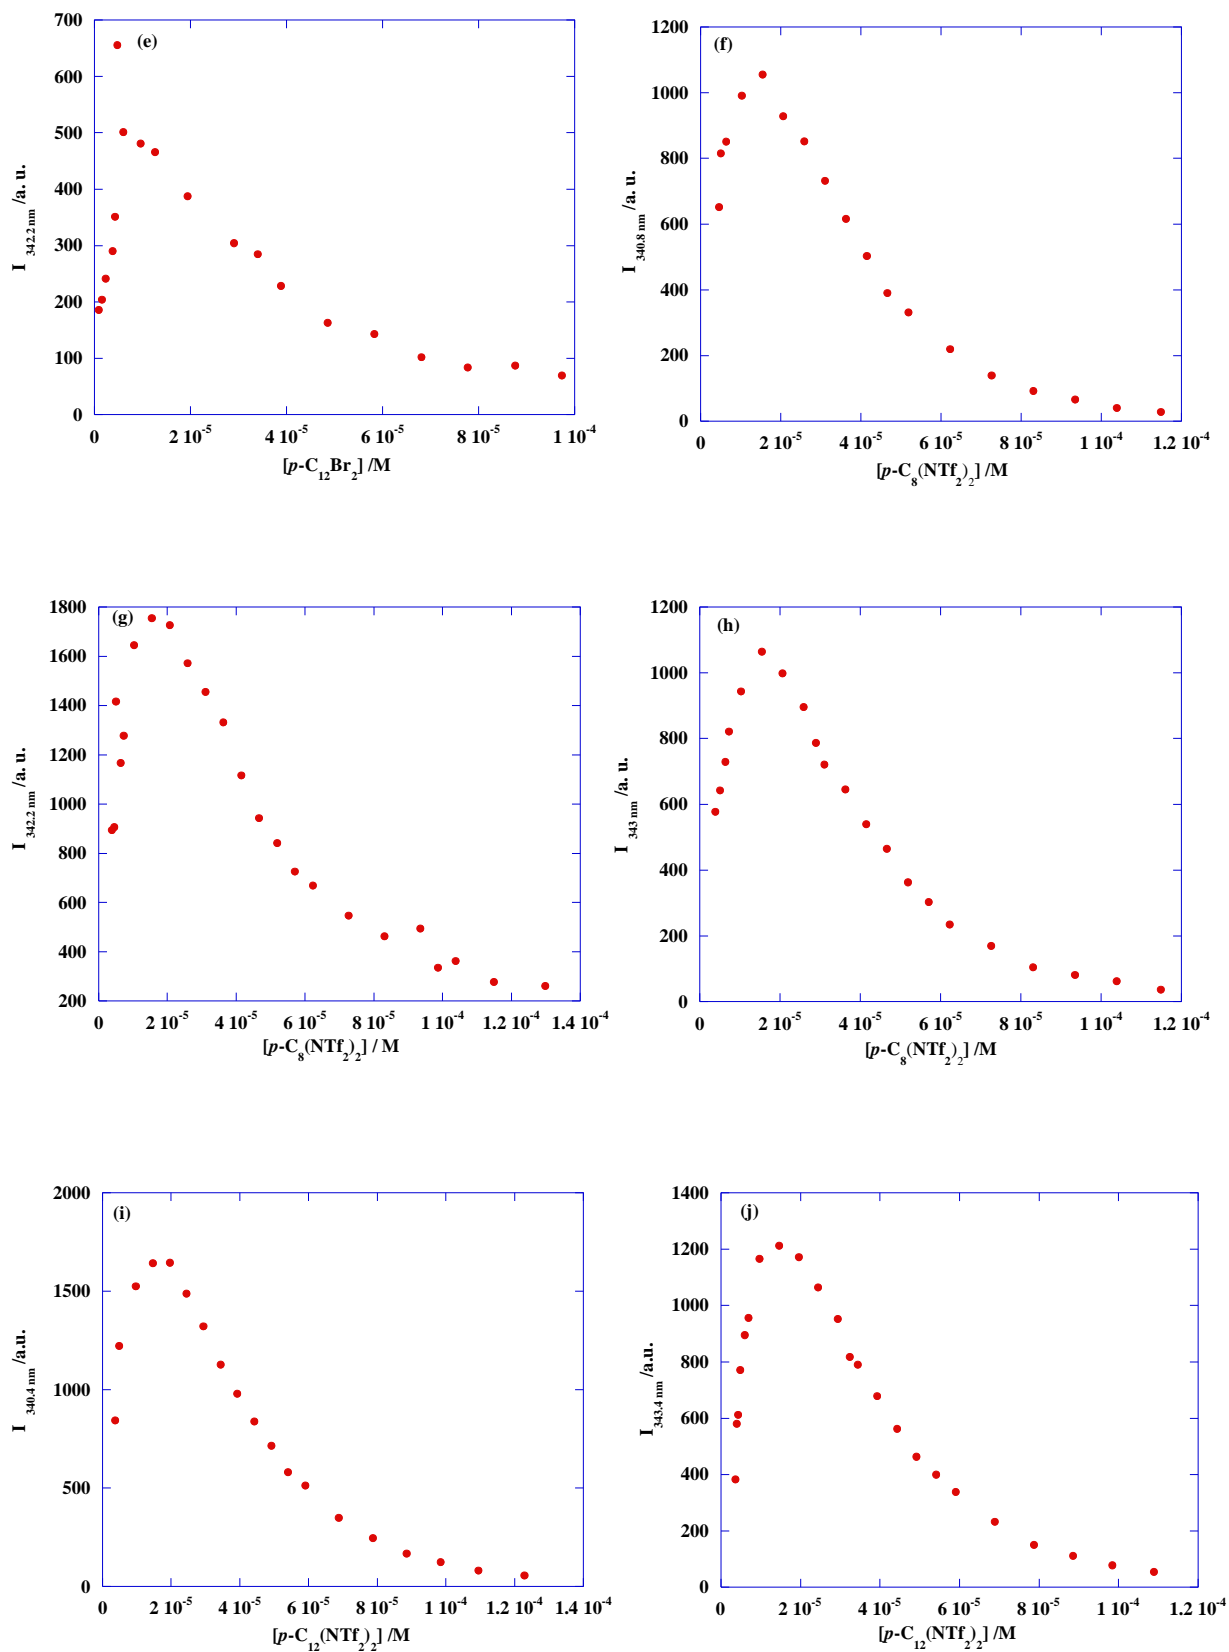

**Fig. S6** Plots of fluorescence intensity as a function of salt concentration corresponding to: (a)  $[p\text{-C}_8\text{Br}_2]$  in ACN; (b)  $[p\text{-C}_8\text{Br}_2]$  in THF; (c)  $[p\text{-C}_{12}\text{Br}_2]$  in 1-PrOH; (d)  $[p\text{-C}_{12}\text{Br}_2]$  in 2-PrOH; (e)  $[p\text{-C}_{12}\text{Br}_2]$  in  $\text{CHCl}_3$ ; (f)  $[p\text{-C}_8(\text{NTf}_2)_2]$  in 2-PrOH; (g)  $[p\text{-C}_8(\text{NTf}_2)_2]$  in  $\text{CHCl}_3$ ; (h)  $[p\text{-C}_8(\text{NTf}_2)_2]$  in 1,4-Diox; (i)  $[p\text{-C}_{12}(\text{NTf}_2)_2]$  in ACN; (j)  $[p\text{-C}_{12}(\text{NTf}_2)_2]$  in THF.

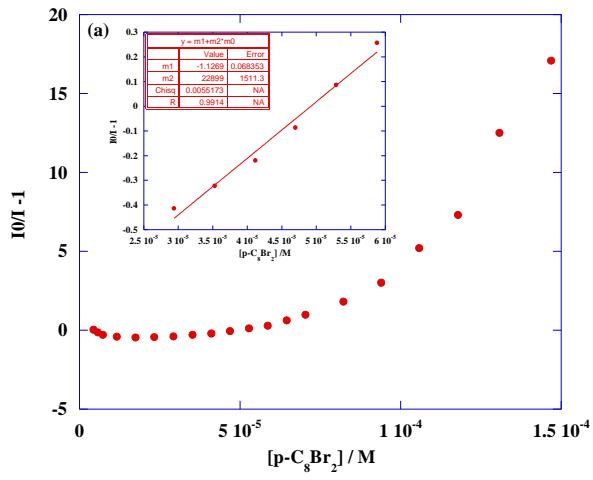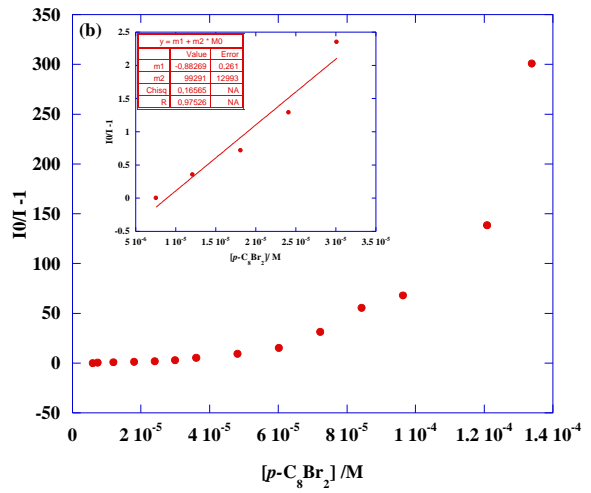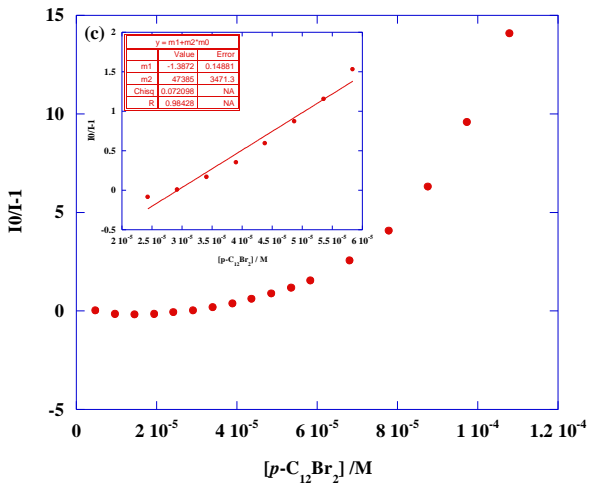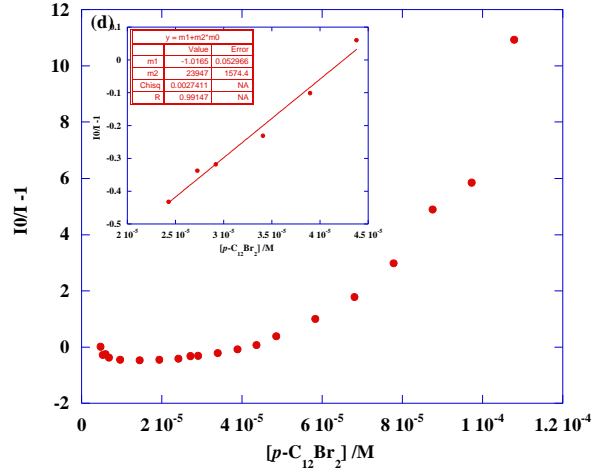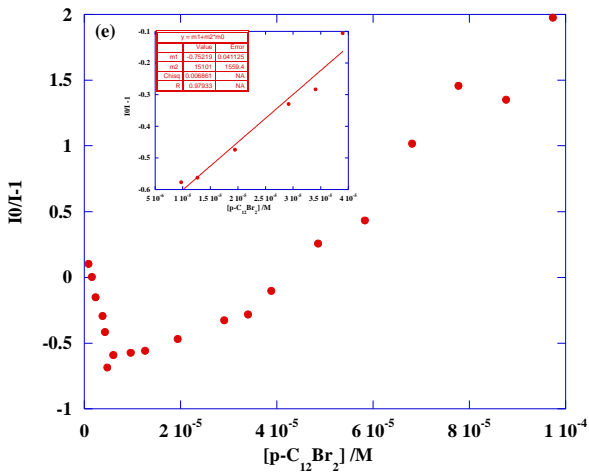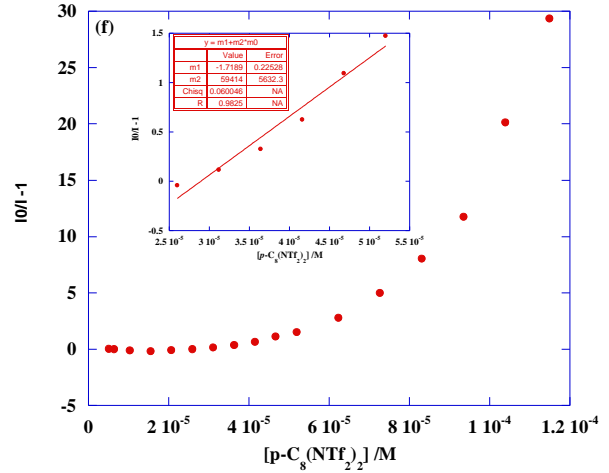

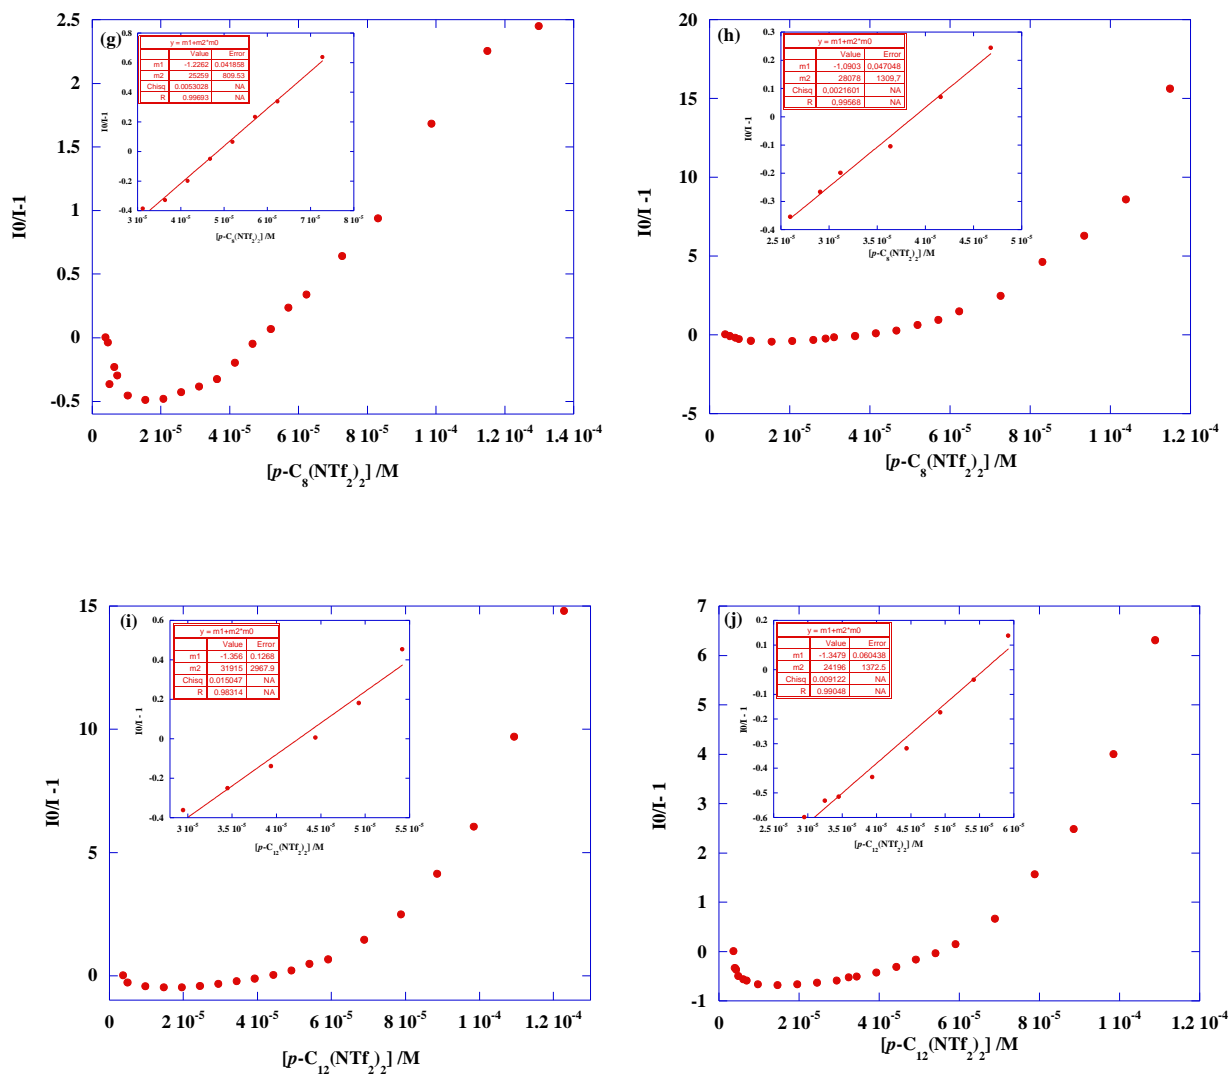

**Fig. S7** Stern-Volmer plots corresponding to: (a)  $[p-C_8Br_2]$  in ACN; (b)  $[p-C_8Br_2]$  in THF; (c)  $[p-C_{12}Br_2]$  in 1-PrOH; (d)  $[p-C_{12}Br_2]$  in 2-PrOH; (e)  $[p-C_{12}Br_2]$  in  $CHCl_3$ ; (f)  $[p-C_8(NTf_2)_2]$  in 2-PrOH; (g)  $[p-C_8(NTf_2)_2]$  in  $CHCl_3$ ; (h)  $[p-C_8(NTf_2)_2]$  in 1,4-Diox; (i)  $[p-C_{12}(NTf_2)_2]$  in ACN; (j)  $[p-C_{12}(NTf_2)_2]$  in THF.

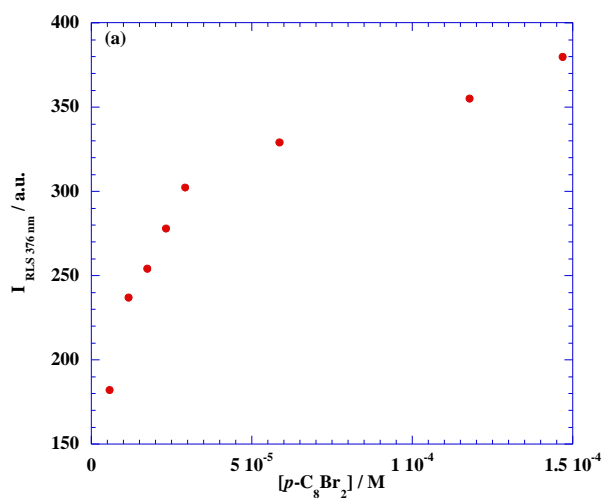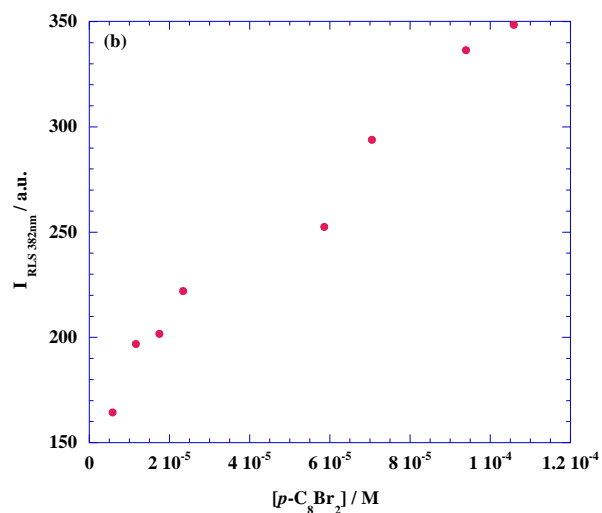

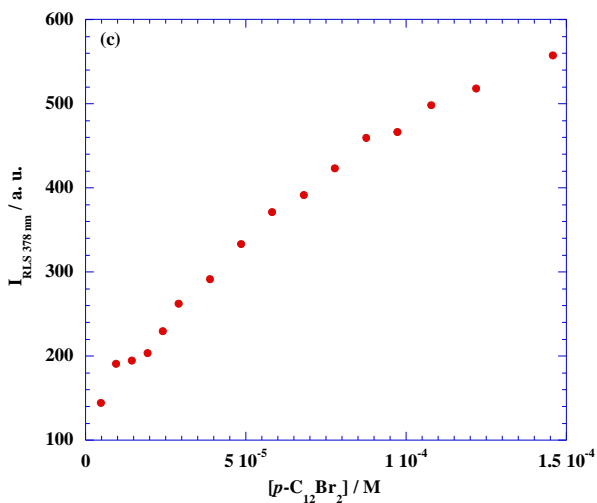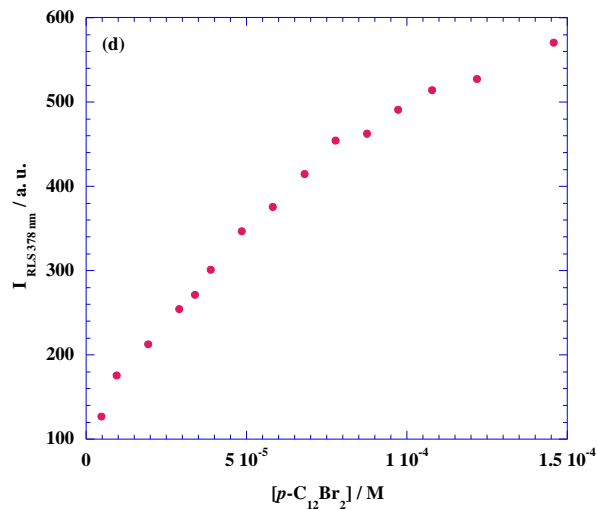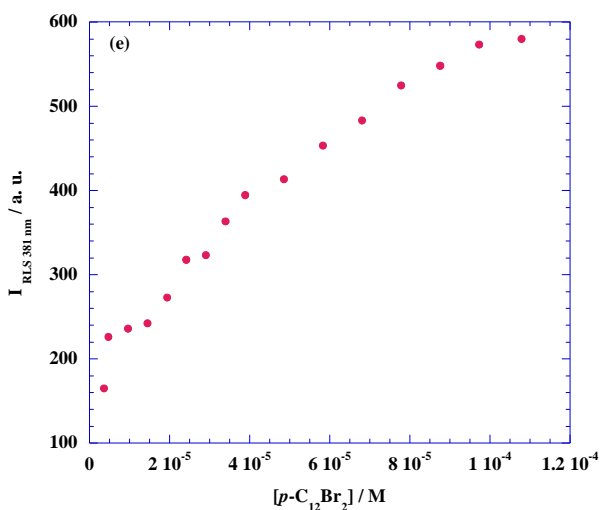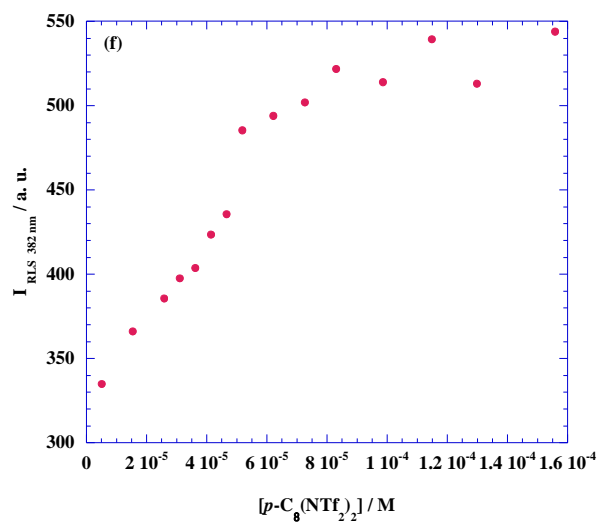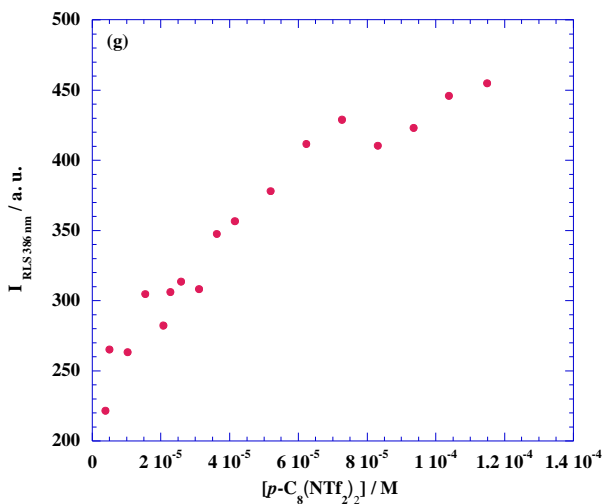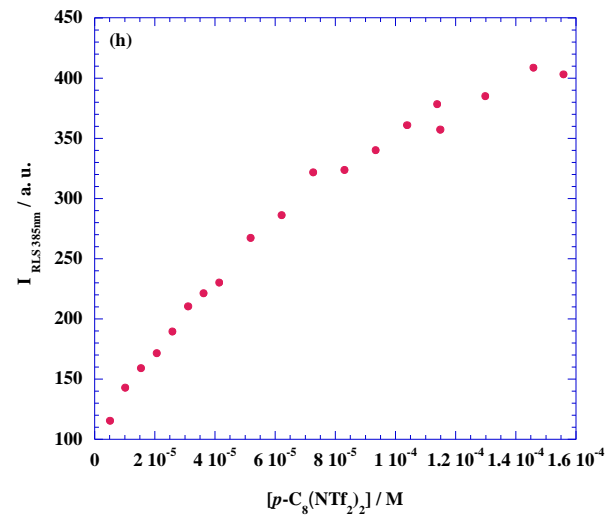

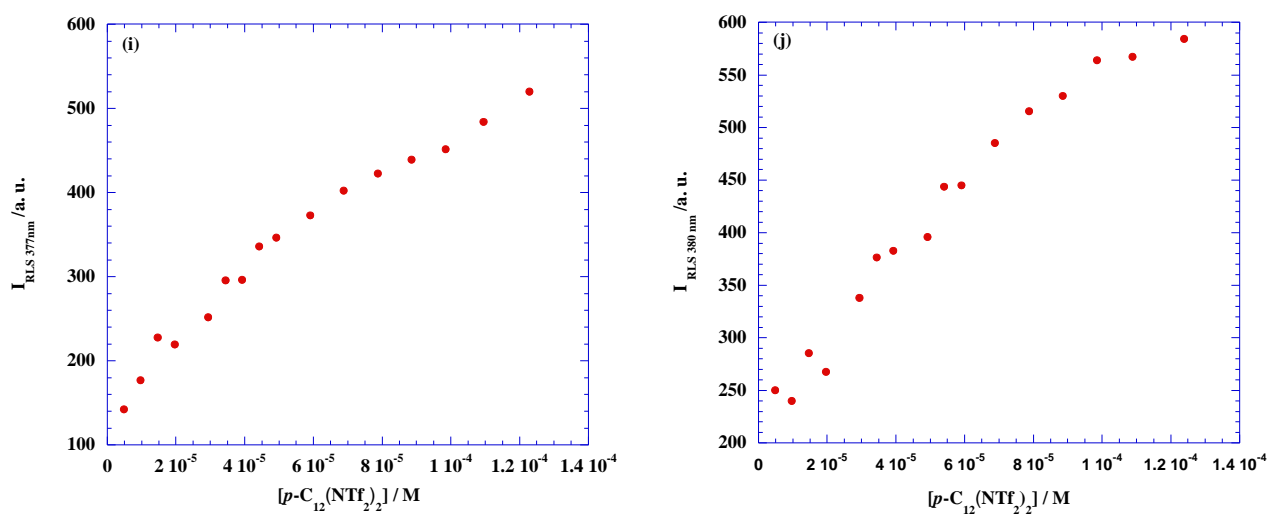

**Fig. S8** Plots of RLS intensity as a function of salt concentration corresponding to: (a)  $[p\text{-C}_8\text{Br}_2]$  in ACN; (b)  $[p\text{-C}_8\text{Br}_2]$  in THF; (c)  $[p\text{-C}_{12}\text{Br}_2]$  in 1-PrOH; (d)  $[p\text{-C}_{12}\text{Br}_2]$  in 2-PrOH; (e)  $[p\text{-C}_{12}\text{Br}_2]$  in  $\text{CHCl}_3$ ; (f)  $[p\text{-C}_8(\text{NTf}_2)_2]$  in 2-PrOH; (g)  $[p\text{-C}_8(\text{NTf}_2)_2]$  in  $\text{CHCl}_3$ ; (h)  $[p\text{-C}_8(\text{NTf}_2)_2]$  in 1,4-Diox; (i)  $[p\text{-C}_{12}(\text{NTf}_2)_2]$  in ACN; (j)  $[p\text{-C}_{12}(\text{NTf}_2)_2]$  in THF.

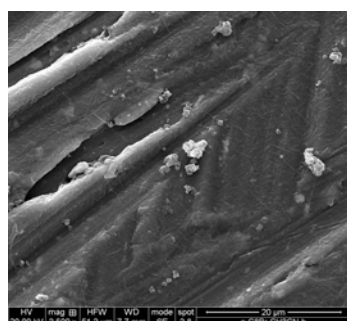

(a)

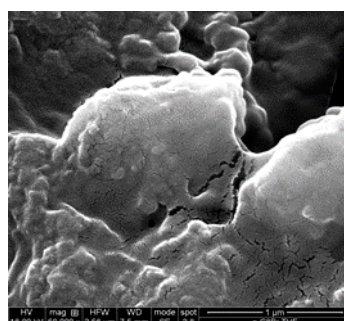

(b)

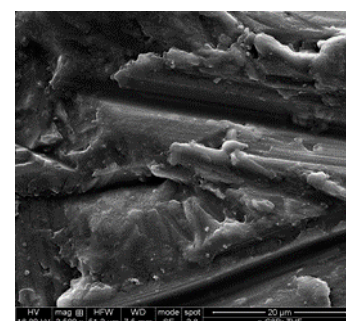

(c)

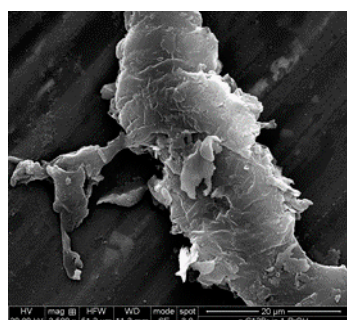

(d)

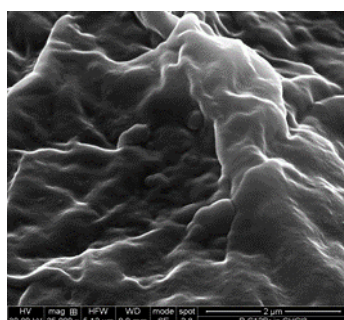

(e)

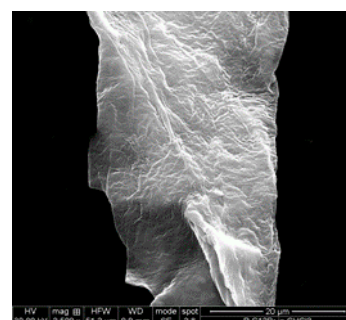

(f)

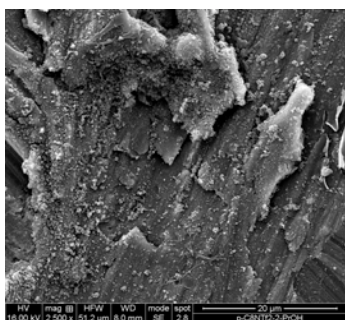

(g)

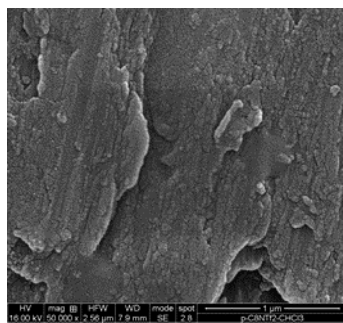

(h)

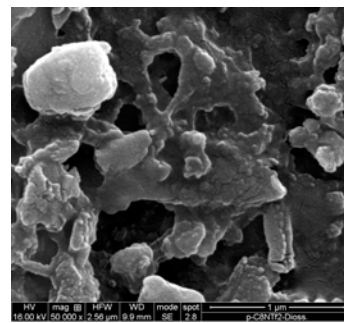

(i)

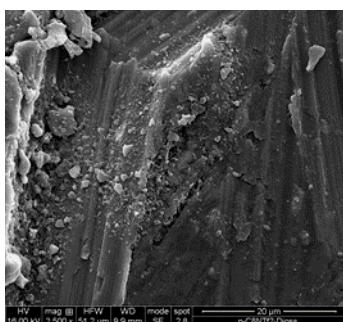

(j)

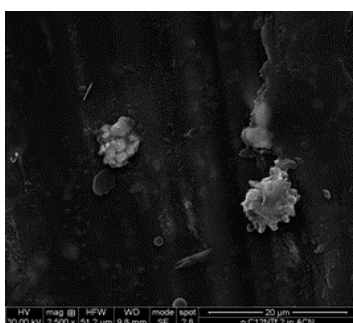

(k)

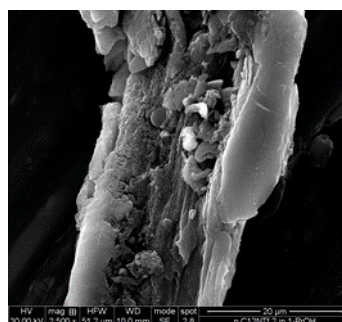

(l)

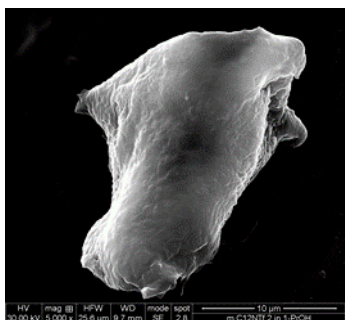

(m)

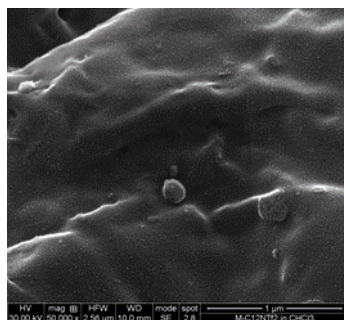

(n)

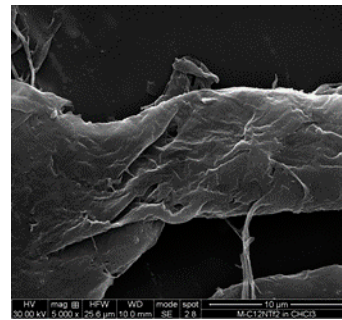

(o)

**Fig. S9** SEM images collected from casting of 0.0001 M solution. (a)  $[p\text{-C}_8\text{Br}_2]/\text{ACN}$ ; (b), (c)  $[p\text{-C}_8\text{Br}_2]/\text{THF}$ ; (d)  $[p\text{-C}_{12}\text{Br}_2]/1\text{-PrOH}$ ; (e), (f)  $[p\text{-C}_{12}\text{Br}_2]/\text{CHCl}_3$ ; (g)  $[p\text{-C}_8(\text{NTf}_2)_2]/2\text{-PrOH}$ ; (h)  $[p\text{-C}_8(\text{NTf}_2)_2]/\text{CHCl}_3$ ; (i), (j)  $[p\text{-C}_8(\text{NTf}_2)_2]/1,4\text{-Diox}$ ; (k)  $[p\text{-C}_{12}(\text{NTf}_2)_2]/\text{ACN}$ ; (l)  $[p\text{-C}_{12}(\text{NTf}_2)_2]/1\text{-PrOH}$ ; (m)  $[m\text{-C}_{12}(\text{NTf}_2)_2]/1\text{-PrOH}$ ; (n), (o)  $[m\text{-C}_{12}(\text{NTf}_2)_2]/\text{CHCl}_3$ .

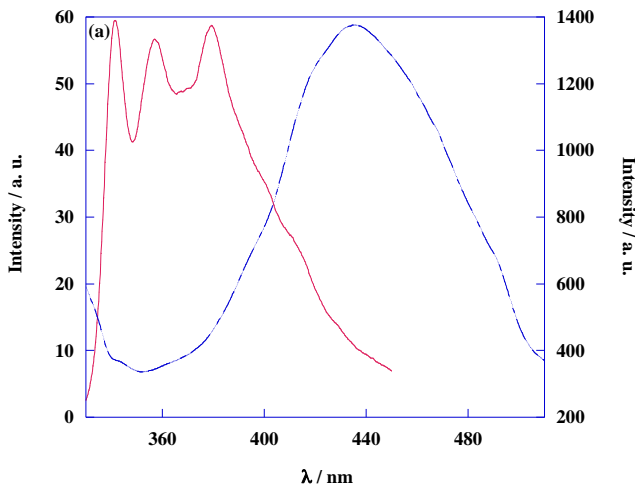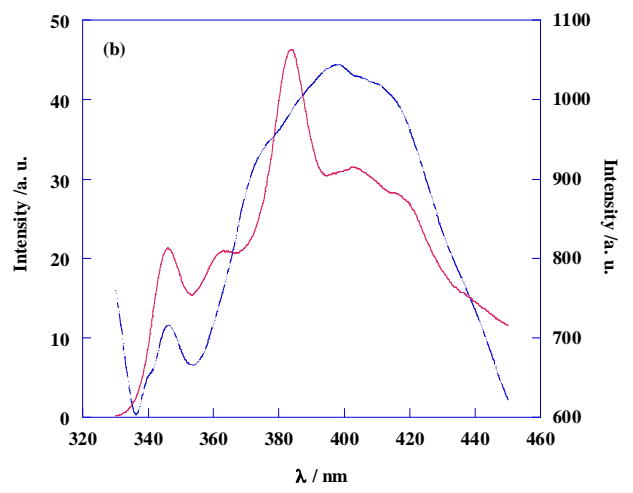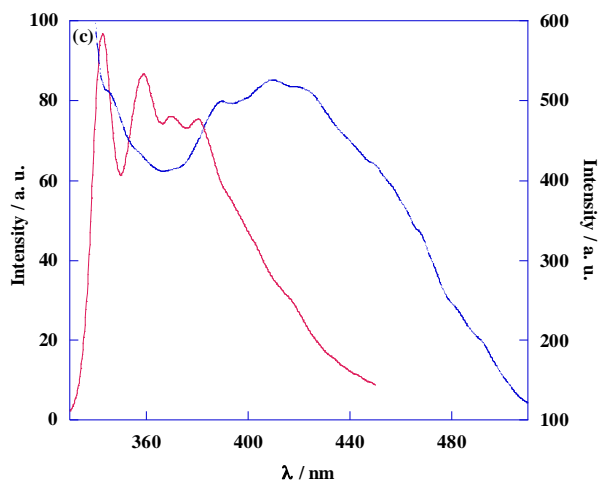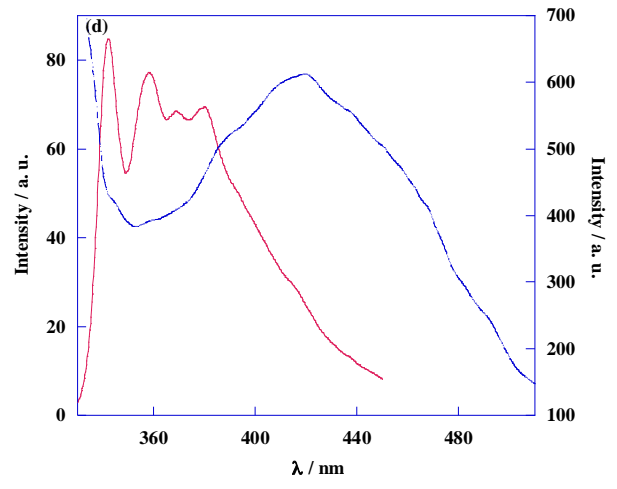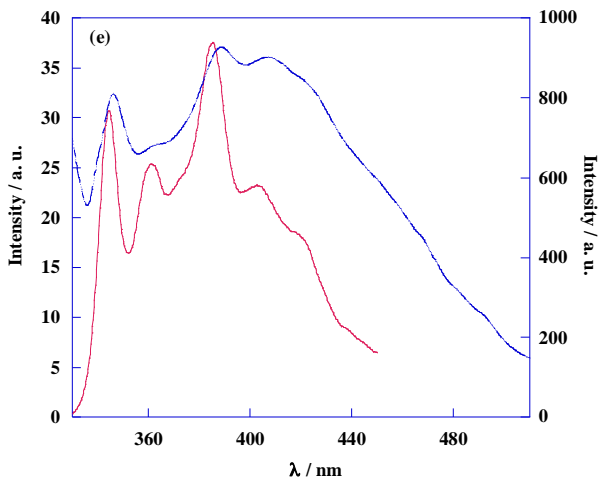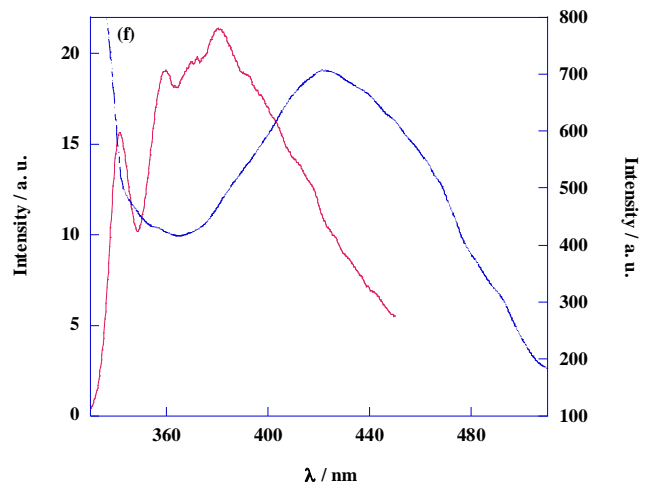



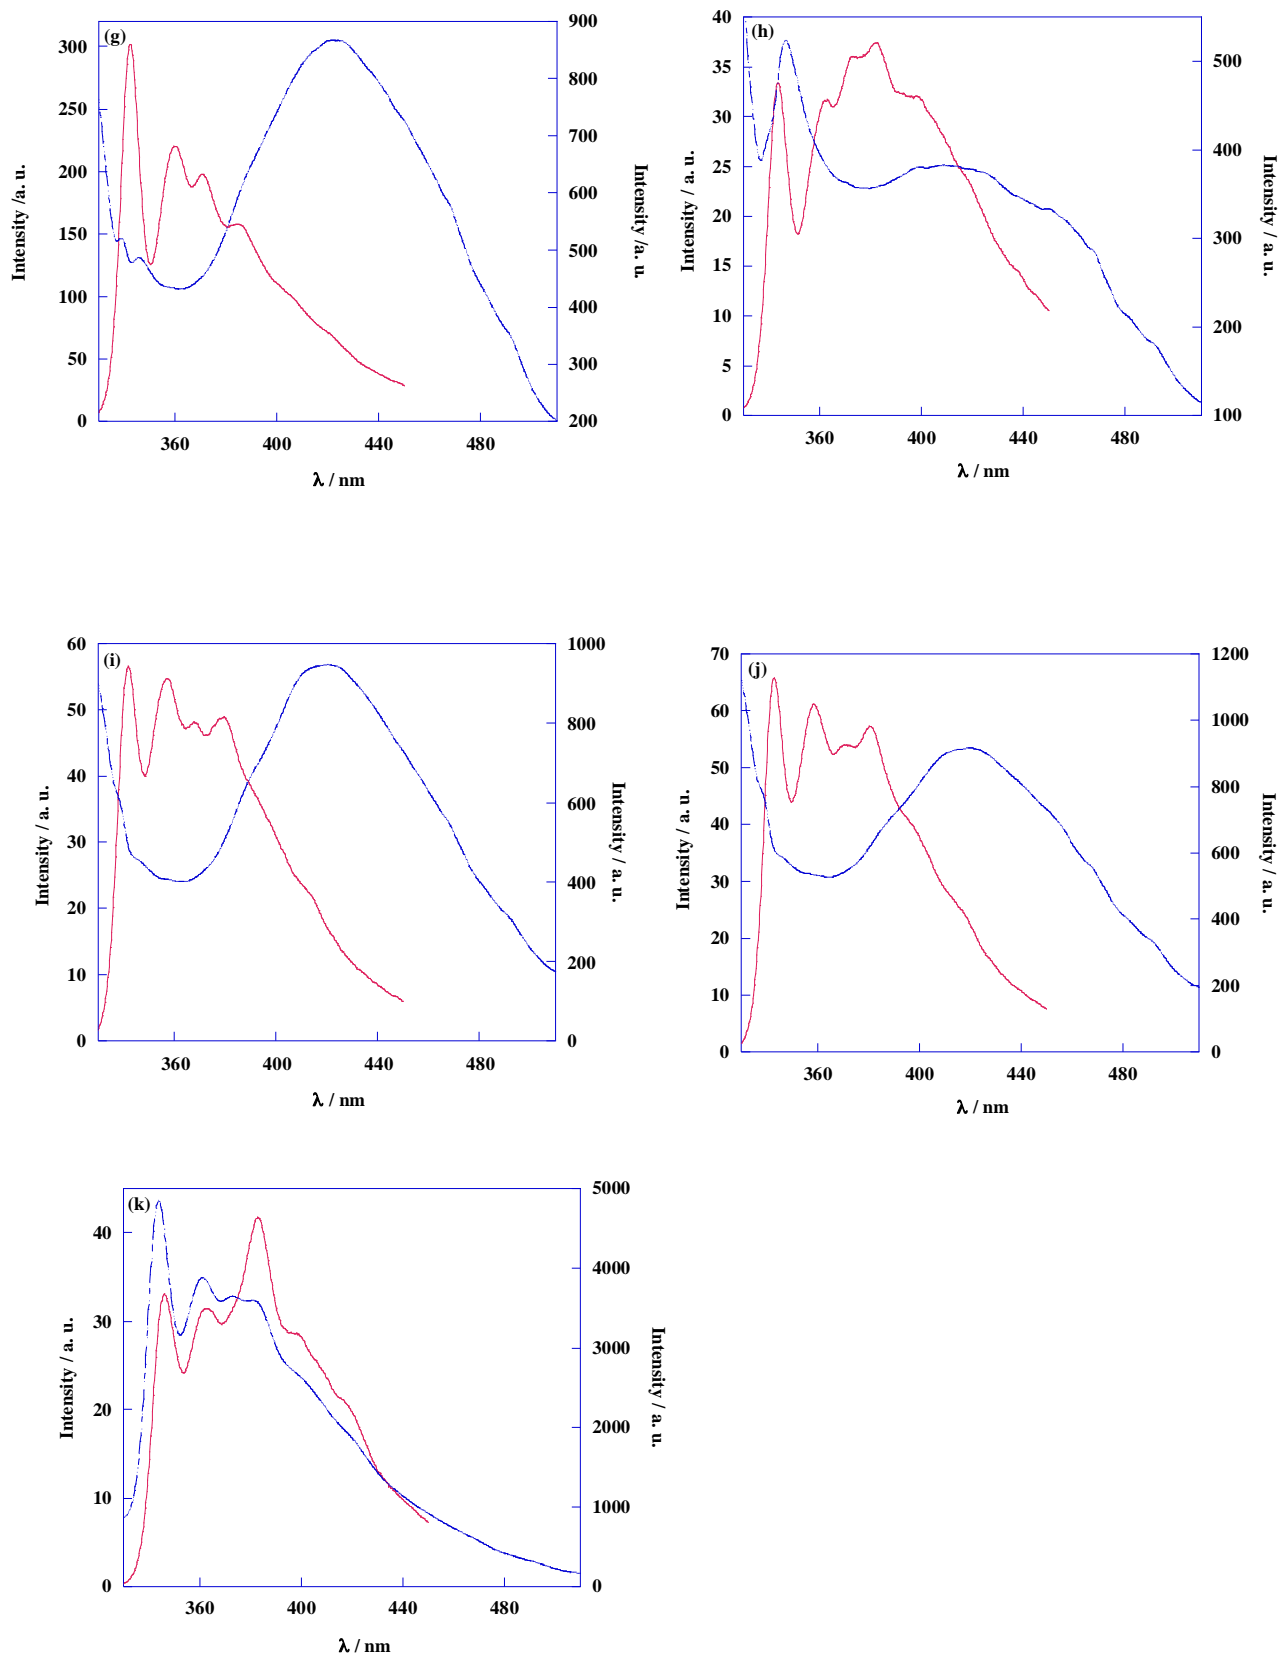

**Fig. S10** Fluorescence spectra in solution (red line) and in solid state (blue line) corresponding to: (a)  $[p\text{-C}_8\text{Br}_2]$  in ACN; (b)  $[p\text{-C}_8\text{Br}_2]$  in THF; (c)  $[p\text{-C}_{12}\text{Br}_2]$  in 1-PrOH; (d)  $[p\text{-C}_{12}\text{Br}_2]$  in 2-PrOH; (e)  $[p\text{-C}_{12}\text{Br}_2]$  in  $\text{CHCl}_3$ ; (f)  $[p\text{-C}_8(\text{NTf}_2)_2]$  in 2-PrOH; (g)  $[p\text{-C}_8(\text{NTf}_2)_2]$  in  $\text{CHCl}_3$ ; (h)  $[p\text{-C}_8(\text{NTf}_2)_2]$  in 1,4-Diox; (i)  $[p\text{-C}_{12}(\text{NTf}_2)_2]$  in ACN; (j)  $[p\text{-C}_{12}(\text{NTf}_2)_2]$  in 1-PrOH; (k)  $[p\text{-C}_{12}(\text{NTf}_2)_2]$  in THF.

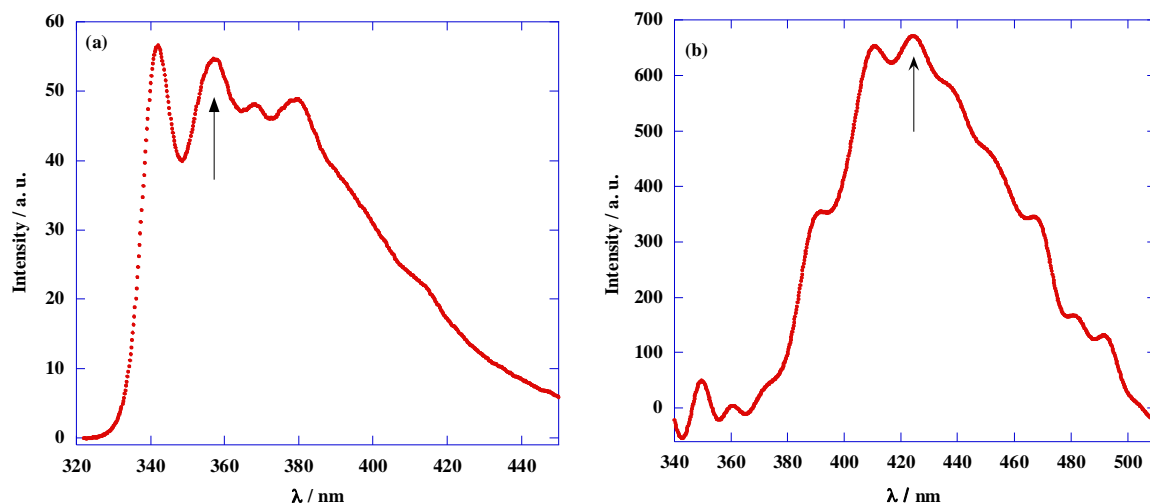

**Fig. S11** (a) Solution and (b) deconvoluted solid state spectra for  $[p\text{-C}_{12}(\text{NTf}_2)_2]$ .

**Table S1** RLS Intensity at 378 nm as function of salt and solvent nature ( $[\text{salt}] = 1 \cdot 10^{-4} \text{ M}$ ).

| Salt                                | Solvent         | $I_{\text{RLS } 378 \text{ nm}}$ |
|-------------------------------------|-----------------|----------------------------------|
| $[p\text{-C}_8\text{Br}_2]$         | ACN             | 355                              |
|                                     | THF             | 348                              |
| $[p\text{-C}_{12}\text{Br}_2]$      | 1-PrOH          | 500                              |
|                                     | 2-PrOH          | 514                              |
|                                     | $\text{CHCl}_3$ | 576                              |
| $[p\text{-C}_8(\text{NTf}_2)_2]$    | 2-PrOH          | 540                              |
|                                     | $\text{CHCl}_3$ | 440                              |
|                                     | 1,4-Diox        | 380                              |
| $[p\text{-C}_{12}(\text{NTf}_2)_2]$ | ACN             | 480                              |
|                                     | 1-PrOH          | 504                              |
|                                     | THF             | 565                              |

**Table S2** Estimated size of solvent molecules on the base of DFT geometries and AMBER atomic radii

| Solvent         | CAC  | a    | b    | c   | m/M  |
|-----------------|------|------|------|-----|------|
| $\text{CHCl}_3$ | 0.82 | 10.0 | 10.0 | 4.8 | 0.48 |
| 2-PrOH          | 1.14 | 5.8  | 5.8  | 3.1 | 0.53 |
| 1,4-Diox        | 1.33 | 6.8  | 6.8  | 4.0 | 0.59 |
| THF             | 1.44 | 6.0  | 6.0  | 4.0 | 0.67 |
| 1-PrOH          | 1.54 | 7.5  | 4.0  | 4.0 | 0.53 |
| ACN             | 2.00 | 5.8  | 2.1  | 2.1 | 0.36 |

a,b and c are dimensions defining ellipsoid shape:  $a=b>c$  for a oblate ellipsoid,  $a>b=c$  for a prolate ellipsoid; m/M is the ratio between the minor and the major axis.

**Table S3**  $\lambda_{MAX}$  and  $\Delta\lambda$  values detected for fluorescence spectra recorded in solution and solid state at  $1 \cdot 10^{-4}$  M.

| <b>Salt</b>                                                    | <b>Solvent</b>    | <b><math>\lambda_{Solution}/nm</math></b> | <b><math>\lambda_{Solid\ State}/nm</math></b> | <b><math>\Delta\lambda/nm</math></b> |
|----------------------------------------------------------------|-------------------|-------------------------------------------|-----------------------------------------------|--------------------------------------|
| [ <i>p</i> -C <sub>8</sub> Br <sub>2</sub> ]                   | ACN               | 358                                       | 434                                           | 76                                   |
|                                                                | THF               | 362                                       | 395                                           | 33                                   |
| [ <i>p</i> -C <sub>12</sub> Br <sub>2</sub> ]                  | 1-PrOH            | 358                                       | 424                                           | 66                                   |
|                                                                | 2-PrOH            | 358                                       | 421                                           | 63                                   |
|                                                                | CHCl <sub>3</sub> | 360                                       | 406                                           | 46                                   |
| [ <i>p</i> -C <sub>8</sub> (NTf <sub>2</sub> ) <sub>2</sub> ]  | 2-PrOH            | 359                                       | 422                                           | 63                                   |
|                                                                | CHCl <sub>3</sub> | 360                                       | 425                                           | 65                                   |
|                                                                | 1,4-Diox          | 362                                       | 413                                           | 51                                   |
| [ <i>p</i> -C <sub>12</sub> (NTf <sub>2</sub> ) <sub>2</sub> ] | ACN               | 358                                       | 418                                           | 60                                   |
|                                                                | 1-PrOH            | 357                                       | 419                                           | 62                                   |
|                                                                | THF               | 362                                       | 374                                           | 12                                   |
